# Supplementary material for: Generalist and Specialist Mite Herbivores Induce Similar Defense Responses in Maize and Barley but Differ in Susceptibility to Benzoxazinoids
Source: Front Plant Sci. 2018 Aug 21;9:1222. doi: 10.3389/fpls.2018.01222 (PMC6110934; doi:10.3389/fpls.2018.01222)
Supplement: Supplementary file 7 [file Data_Sheet_2.xlsx]

## Sheet: Data Sheet 2
Data Sheet 2: Orthologous Arabidopsis and maize genes used for the Hormonometer analysis.
Maize Gene ID	Probeset ID	locus
AC148152.3_FG008	258512_at	AT3G06510
AC149475.2_FG002	245340_at	AT4G14420
AC149475.2_FG005	245691_at	AT5G04240
AC149475.2_FG007	266189_at	AT2G39020
AC149818.2_FG004	264061_at	AT2G27970
AC149818.2_FG006	260317_at	AT1G63800
AC149829.2_FG003	261909_at	AT1G80680
AC155496.2_FG009	248882_at	AT5G46210
AC155624.2_FG011	265417_at	AT2G20920
AC177897.2_FG002	266200_at	AT2G38920
AC182482.3_FG003	262751_at	AT1G16310
AC183950.2_FG005	263958_at	AT2G36240
AC184130.4_FG012	254625_at	AT4G18470
AC185300.4_FG002	251550_at	AT3G58800
AC185415.3_FG005	262420_at	AT1G50300
AC187157.4_FG002	259378_at	AT3G16310
AC187157.4_FG005	265060_at	AT1G52150
AC188023.3_FG005	248285_at	AT5G52960
AC189750.4_FG004	254343_at	AT4G21990
AC190609.3_FG002	251486_at	AT3G59540
AC190609.3_FG004	261253_at	AT1G05840
AC190623.3_FG001	267526_at	AT2G30570
AC190628.4_FG007	257046_at	AT3G19740
AC190999.2_FG004	267508_at	AT2G45700
AC191071.3_FG001	256012_at	AT1G19250
AC191113.2_FG002	247265_at	AT5G64550
AC192244.3_FG007	265324_at	AT2G18250
AC194056.3_FG008	260804_at	AT1G78410
AC194341.4_FG002	253986_at	AT4G26210
AC194341.4_FG004	259050_at	AT3G03360
AC194970.5_FG001	246198_at	AT4G36810
AC194970.5_FG004	260936_at	AT1G45150
AC194970.5_FG005	261455_at	AT1G21070
AC195347.4_FG004	249359_at	AT5G40470
AC195587.4_FG004	246909_at	AT5G25770
AC195864.3_FG017	263684_at	AT1G26900
AC195874.2_FG002	261733_at	AT1G47830
AC196475.3_FG004	248200_at	AT5G54160
AC196779.3_FG003	254096_at	AT4G25150
AC197118.3_FG005	265079_at	AT1G55460
AC197146.3_FG001	257813_at	AT3G25100
AC197246.3_FG001	266394_at	AT2G43130
AC197555.3_FG008	259100_at	AT3G04880
AC197699.3_FG003	245360_at	AT4G16330
AC197705.4_FG003	251137_at	AT5G01300
AC197705.4_FG007	250792_at	AT5G05520
AC197705.4_FG011	251741_at	AT3G56040
AC197758.3_FG004	250798_at	AT5G05340
AC198206.5_FG001	250375_at	AT5G11540
AC198353.5_FG004	257180_at	AT3G13180
AC198403.3_FG001	259946_at	AT1G71450
AC198481.3_FG004	265814_at	AT2G17930
AC198518.3_FG003	246433_at	AT5G17510
AC198725.4_FG009	254652_at	AT4G18170
AC198979.4_FG009	257918_at	AT3G23230
AC199067.2_FG004	257214_at	AT3G15040
AC199315.4_FG001	251422_at	AT3G60540
AC199526.5_FG003	263014_at	AT1G23400
AC199782.5_FG001	261627_at	AT1G01910
AC199782.5_FG002	254845_at	AT4G11820
AC200753.3_FG003	250070_at	AT5G17980
AC201815.4_FG001	264817_at	AT1G03540
AC202439.3_FG006	248970_at	AT5G45380
AC202915.3_FG002	259352_at	AT3G05170
AC203173.3_FG004	262064_at	AT1G56070
AC203294.3_FG012	246293_at	AT3G56710
AC203535.4_FG001	264709_at	AT1G09770
AC203535.4_FG004	259896_at	AT1G71500
AC203753.4_FG006	258109_at	AT3G23640
AC203841.3_FG002	251168_at	AT3G63370
AC203841.3_FG009	246320_at	AT1G16560
AC203966.5_FG005	248371_at	AT5G51810
AC204292.4_FG002	261277_at	AT1G20230
AC204472.3_FG002	263427_at	AT2G22260
AC204530.4_FG002	245206_at	AT5G12290
AC204530.4_FG003	266418_at	AT2G38750
AC205012.3_FG002	265461_at	AT2G46500
AC205320.3_FG004	262611_at	AT1G14060
AC205376.4_FG003	255331_at	AT4G04330
AC205574.3_FG006	257267_at	AT3G15030
AC205677.3_FG001	251808_at	AT3G55480
AC205703.4_FG002	262769_at	AT1G13180
AC205703.4_FG010	265013_at	AT1G24460
AC205735.3_FG006	248871_at	AT5G46680
AC206223.3_FG006	247829_at	AT5G58520
AC206259.3_FG003	252892_at	AT4G39420
AC206638.3_FG007	251617_at	AT3G58000
AC206764.4_FG001	264723_at	AT1G22960
AC206941.2_FG002	259167_at	AT3G01570
AC206968.3_FG003	260842_at	AT1G29150
AC207342.3_FG007	254953_at	AT4G10925
AC207628.4_FG009	261522_at	AT1G71710
AC207656.3_FG002	253662_at	AT4G30080
AC207728.2_FG003	258533_at	AT3G06670
AC208023.3_FG001	248512_at	AT5G50460
AC208110.2_FG006	258867_at	AT3G03130
AC208201.3_FG001	251090_at	AT5G01340
AC208327.4_FG003	265947_at	AT2G19540
AC208346.3_FG004	247811_at	AT5G58430
AC208897.3_FG004	246831_at	AT5G26340
AC209208.3_FG002	255674_at	AT4G00430
AC209242.3_FG003	264810_at	AT1G08750
AC209718.1_FG009	260736_at	AT1G17630
AC209835.4_FG004	253522_at	AT4G31290
AC209858.4_FG002	258166_at	AT3G21540
AC209987.4_FG002	262819_at	AT1G11600
AC210003.2_FG015	256796_at	AT3G22210
AC210013.4_FG008	262794_at	AT1G13120
AC210013.4_FG009	259356_at	AT3G05250
AC210013.4_FG018	246158_at	AT5G19855
AC210013.4_FG019	251638_at	AT3G57490
AC210169.3_FG002	262938_at	AT1G79540
AC210173.4_FG005	253088_at	AT4G36220
AC210848.3_FG004	266754_at	AT2G46980
AC211164.5_FG003	264445_at	AT1G27290
AC211276.4_FG008	252040_at	AT3G52060
AC211357.4_FG004	259630_at	AT1G56350
AC211394.4_FG004	246636_at	AT5G34850
AC211737.3_FG012	254433_at	AT4G20850
AC212068.4_FG005	264184_at	AT1G54790
AC212219.3_FG005	250793_at	AT5G05600
AC212353.4_FG004	249398_at	AT5G40250
AC212570.3_FG006	266510_at	AT2G47990
AC212684.3_FG012	253430_at	AT4G32430
AC212754.3_FG004	257502_at	AT1G78110
AC212859.3_FG007	253560_at	AT4G31160
AC213050.3_FG001	250878_at	AT5G04050
AC213099.3_FG001	251008_at	AT5G02710
AC213099.3_FG002	250890_at	AT5G04520
AC213463.3_FG002	259756_at	AT1G71080
AC213463.3_FG007	259661_at	AT1G55265
AC213521.3_FG005	256020_at	AT1G58290
AC213857.4_FG003	248164_at	AT5G54490
AC213884.3_FG001	267306_at	AT2G30060
AC214119.3_FG009	248737_at	AT5G48120
AC214266.3_FG002	253190_at	AT4G35335
AC214507.3_FG001	254800_at	AT4G13070
AC214635.3_FG002	255947_at	AT1G22040
AC214640.3_FG003	259505_at	AT1G15810
AC215198.3_FG002	253584_at	AT4G30700
AC215201.3_FG005	264069_at	AT2G28000
AC216010.3_FG001	264711_at	AT1G09800
AC216886.3_FG002	246534_at	AT5G15890
AC217121.3_FG007	263054_at	AT2G04620
AC217300.3_FG005	245852_at	AT5G13510
AC217358.3_FG003	251474_at	AT3G59630
AC217358.3_FG005	265037_at	AT1G03860
AC217358.3_FG007	255007_at	AT4G10020
AC217358.3_FG010	266173_at	AT2G02410
AC217358.3_FG011	256804_at	AT3G20920
AC217401.3_FG003	250480_at	AT5G10290
AC217499.3_FG001	249701_at	AT5G35460
AC217499.3_FG003	262168_at	AT1G74730
AC217842.3_FG001	248720_at	AT5G47750
AC217887.3_FG004	246182_at	AT5G20870
AC217897.3_FG010	259214_at	AT3G09085
AC217947.4_FG002	253664_at	AT4G30210
AC217965.2_FG012	258232_at	AT3G27750
AC217975.3_FG001	258902_at	AT3G06483
AC217977.3_FG001	259018_at	AT3G07390
AC217977.3_FG003	250866_at	AT5G03905
AC218457.2_FG013	248603_at	AT5G49430
AC218972.3_FG001	266053_at	AT2G40730
AC218972.3_FG004	247856_at	AT5G58300
AC219006.2_FG007	264077_at	AT2G28560
AC219061.2_FG007	266441_at	AT2G43250
AC219190.3_FG002	253008_at	AT4G38210
AC220970.4_FG002	247590_at	AT5G60720
AC225127.3_FG003	248350_at	AT5G52160
AC225147.4_FG003	250791_at	AT5G05610
AC225185.3_FG004	248032_at	AT5G55860
AC225555.3_FG005	255044_at	AT4G09680
AC225718.2_FG006	265460_at	AT2G46600
AC226227.2_FG005	252243_at	AT3G50120
AC226235.2_FG001	256454_at	AT1G75280
AC226235.2_FG003	266325_at	AT2G46630
AC226248.1_FG002	260477_at	AT1G11050
AC226368.2_FG006	249952_at	AT5G18950
AC230013.2_FG002	256713_at	AT2G34060
AC230013.2_FG007	267007_at	AT2G34480
AC231747.1_FG001	263050_at	AT2G05170
AC233851.1_FG009	257670_at	AT3G20340
AC233851.1_FG014	264286_at	AT1G61870
AC233853.1_FG002	251575_at	AT3G58120
AC233853.1_FG003	266995_at	AT2G34500
AC233870.1_FG006	245045_at	AT2G26590
AC233872.1_FG003	250762_at	AT5G05990
AC233878.1_FG004	264526_at	AT1G10130
AC233879.1_FG002	263385_at	AT2G40170
AC233888.1_FG001	247879_at	AT5G57770
AC233888.1_FG002	247921_at	AT5G57660
AC233892.1_FG001	264806_at	AT1G08610
AC233893.1_FG002	250104_at	AT5G16610
AC233893.1_FG006	261308_at	AT1G48480
AC233895.1_FG001	246307_at	AT3G51800
AC233898.1_FG004	262025_at	AT1G35510
AC233945.1_FG003	259743_at	AT1G71140
AC233960.1_FG005	257491_at	AT1G06170
AC233961.1_FG001	262375_at	AT1G73100
AC233979.1_FG009	248988_at	AT5G45190
AC233979.1_FG010	253119_at	AT4G35980
AC234154.1_FG008	259057_at	AT3G03310
AC234156.1_FG005	263628_at	AT2G04780
AC234157.1_FG002	262172_at	AT1G74970
AC234157.1_FG003	267285_at	AT2G23690
AC234160.1_FG003	258151_at	AT3G18080
AC234161.1_FG010	248760_at	AT5G47570
AC234164.1_FG004	259686_at	AT1G63100
AC234171.1_FG003	246653_at	AT5G35200
AC234185.1_FG006	247631_at	AT5G60440
AC234199.1_FG003	252350_at	AT3G48190
AC234201.1_FG003	247300_at	AT5G63910
AC234203.1_FG009	249119_at	AT5G43720
AC234520.1_FG003	261610_at	AT1G49560
AC234520.1_FG005	246278_at	AT4G37190
AC234522.1_FG005	254187_at	AT4G23890
AC235543.1_FG003	253049_at	AT4G37300
AY530952.1_FG001	250326_at	AT5G12080
EF517601.1_FG015	258553_at	AT3G06960
GRMZM2G000014	262428_at	AT1G47570
GRMZM2G000052	265244_at	AT2G43020
GRMZM2G000171	253171_at	AT4G35040
GRMZM2G000177	246960_at	AT5G24710
GRMZM2G000256	250371_at	AT5G11450
GRMZM2G000261	265987_at	AT2G24240
GRMZM2G000376	267458_at	AT2G33670
GRMZM2G000393	253465_at	AT4G32120
GRMZM2G000397	262877_at	AT1G64850
GRMZM2G000510	251902_at	AT3G54110
GRMZM2G000531	261076_at	AT1G07420
GRMZM2G000540	248788_at	AT5G47430
GRMZM2G000587	264704_at	AT1G70090
GRMZM2G000592	259473_at	AT1G19025
GRMZM2G000610	267183_at	AT2G44020
GRMZM2G000622	260250_at	AT1G74260
GRMZM2G000660	256441_at	AT3G10940
GRMZM2G000665	251466_at	AT3G59340
GRMZM2G000674	257979_at	AT3G20730
GRMZM2G000686	258198_at	AT3G14020
GRMZM2G000719	248899_at	AT5G46390
GRMZM2G000741	262355_at	AT1G72820
GRMZM2G000777	261508_at	AT1G71730
GRMZM2G000812	254956_at	AT4G10850
GRMZM2G000823	251989_at	AT3G53110
GRMZM2G000932	254175_at	AT4G24050
GRMZM2G000936	255492_at	AT4G02680
GRMZM2G000937	246598_at	AT5G14850
GRMZM2G001088	261419_at	AT1G07840
GRMZM2G001160	258898_at	AT3G05740
GRMZM2G001180	245344_at	AT4G15475
GRMZM2G001191	267513_at	AT2G45620
GRMZM2G001255	260871_at	AT1G29040
GRMZM2G001296	256715_at	AT2G34090
GRMZM2G001297	258524_at	AT3G06810
GRMZM2G001334	256888_at	AT3G15160
GRMZM2G001363	248348_at	AT5G52190
GRMZM2G001444	245588_at	AT4G15030
GRMZM2G001457	252543_at	AT3G45780
GRMZM2G001466	245508_at	AT4G15720
GRMZM2G001530	248954_at	AT5G45420
GRMZM2G001541	250265_at	AT5G12900
GRMZM2G001551	261882_at	AT1G80770
GRMZM2G001652	266650_at	AT2G25800
GRMZM2G001653	261746_at	AT1G08380
GRMZM2G001676	248932_at	AT5G46050
GRMZM2G001750	260232_at	AT1G74640
GRMZM2G001755	256411_at	AT1G66670
GRMZM2G001772	264884_at	AT1G61170
GRMZM2G001777	255409_at	AT4G03090
GRMZM2G001803	260003_at	AT1G68100
GRMZM2G001812	261339_at	AT1G35710
GRMZM2G001869	257762_at	AT3G23100
GRMZM2G001898	263275_at	AT2G14170
GRMZM2G001904	259880_at	AT1G76730
GRMZM2G001918	252492_at	AT3G46740
GRMZM2G001930	261713_at	AT1G32640
GRMZM2G001938	250893_at	AT5G03795
GRMZM2G001956	258929_at	AT3G10060
GRMZM2G002100	260571_at	AT2G43790
GRMZM2G002115	254154_at	AT4G24460
GRMZM2G002119	261496_at	AT1G28360
GRMZM2G002121	247513_at	AT5G61510
GRMZM2G002128	267141_at	AT2G38090
GRMZM2G002135	259113_at	AT3G05510
GRMZM2G002165	249007_at	AT5G44650
GRMZM2G002220	263483_at	AT2G04030
GRMZM2G002276	261041_at	AT1G17440
GRMZM2G002297	255991_at	AT1G29820
GRMZM2G002309	266504_at	AT2G47820
GRMZM2G002361	254088_at	AT4G24880
GRMZM2G002391	264316_at	AT1G70330
GRMZM2G002416	258515_at	AT3G06650
GRMZM2G002420	266552_at	AT2G46330
GRMZM2G002427	255231_at	AT4G05460
GRMZM2G002440	253949_at	AT4G26780
GRMZM2G002492	262818_at	AT1G11755
GRMZM2G002515	265250_at	AT2G01950
GRMZM2G002523	246425_at	AT5G17420
GRMZM2G002616	254654_at	AT4G18040
GRMZM2G002617	250548_at	AT5G08120
GRMZM2G002652	248207_at	AT5G53970
GRMZM2G002687	258820_at	AT3G04600
GRMZM2G002699	257238_at	AT3G17430
GRMZM2G002704	265208_at	AT2G36690
GRMZM2G002754	256468_at	AT1G32550
GRMZM2G002765	264585_at	AT1G05180
GRMZM2G002807	264018_at	AT2G21170
GRMZM2G002830	257126_at	AT3G20060
GRMZM2G002859	253229_at	AT4G34660
GRMZM2G002874	248147_at	AT5G54900
GRMZM2G002898	266557_at	AT2G46080
GRMZM2G002959	246304_at	AT3G51840
GRMZM2G003002	267492_at	AT2G30620
GRMZM2G003022	255555_at	AT4G01810
GRMZM2G003028	245693_at	AT5G04260
GRMZM2G003033	263943_at	AT2G35800
GRMZM2G003038	253695_at	AT4G29510
GRMZM2G003064	264523_at	AT1G10030
GRMZM2G003096	267247_at	AT2G30170
GRMZM2G003157	250531_at	AT5G08650
GRMZM2G003165	254785_at	AT4G12730
GRMZM2G003172	249342_at	AT5G40660
GRMZM2G003179	245999_at	AT5G20650
GRMZM2G003318	266638_at	AT2G35490
GRMZM2G003342	253848_at	AT4G28020
GRMZM2G003411	261763_at	AT1G15520
GRMZM2G003417	255594_at	AT4G01660
GRMZM2G003424	256971_at	AT3G21100
GRMZM2G003563	251309_at	AT3G61220
GRMZM2G003565	247307_at	AT5G63860
GRMZM2G003607	250900_at	AT5G03470
GRMZM2G003638	265196_at	AT2G36740
GRMZM2G003640	258095_at	AT3G23610
GRMZM2G003642	254358_at	AT4G22310
GRMZM2G003656	260168_at	AT1G71980
GRMZM2G003669	257751_at	AT3G18690
GRMZM2G003682	267357_at	AT2G40000
GRMZM2G003692	259051_at	AT3G03330
GRMZM2G003715	261616_at	AT1G33060
GRMZM2G003718	256702_at	AT3G30380
GRMZM2G003732	259406_at	AT1G17690
GRMZM2G003734	251818_at	AT3G54860
GRMZM2G003738	249522_at	AT5G38700
GRMZM2G003750	258081_at	AT3G26085
GRMZM2G003752	251395_at	AT2G45470
GRMZM2G003762	249922_at	AT5G19140
GRMZM2G003765	261824_at	AT1G11430
GRMZM2G003769	252411_at	AT3G47430
GRMZM2G003784	245262_at	AT4G16563
GRMZM2G003814	252542_at	AT3G45770
GRMZM2G003835	253691_at	AT4G29660
GRMZM2G003853	261228_at	AT1G20050
GRMZM2G003875	264675_at	AT1G09830
GRMZM2G003883	247989_at	AT5G56350
GRMZM2G003897	248173_at	AT5G54580
GRMZM2G003944	262028_at	AT1G35560
GRMZM2G003963	248952_at	AT5G45410
GRMZM2G004006	254137_at	AT4G24930
GRMZM2G004023	263162_at	AT1G54150
GRMZM2G004040	248303_at	AT5G53170
GRMZM2G004057	265307_at	AT2G20310
GRMZM2G004106	267472_at	AT2G02850
GRMZM2G004131	252996_s_at	AT4G38460
GRMZM2G004161	252367_at	AT3G48360
GRMZM2G004182	260688_at	AT1G17665
GRMZM2G004183	246535_at	AT5G15900
GRMZM2G004222	245027_at	AT2G26550
GRMZM2G004259	251483_at	AT3G59650
GRMZM2G004320	246009_at	AT5G08335
GRMZM2G004352	263880_at	AT2G21960
GRMZM2G004356	255497_at	AT4G02590
GRMZM2G004382	251536_at	AT3G58610
GRMZM2G004397	261649_at	AT1G27700
GRMZM2G004414	264644_at	AT1G08960
GRMZM2G004435	253326_at	AT4G33440
GRMZM2G004455	259769_at	AT1G29400
GRMZM2G004466	247268_at	AT5G64080
GRMZM2G004468	249351_at	AT5G40440
GRMZM2G004475	267333_at	AT2G19430
GRMZM2G004480	259220_at	AT3G03550
GRMZM2G004511	267538_at	AT2G41870
GRMZM2G004582	247306_at	AT5G63870
GRMZM2G004583	257856_at	AT3G12930
GRMZM2G004590	263897_at	AT2G21940
GRMZM2G004592	248289_at	AT5G52880
GRMZM2G004683	253195_at	AT4G35420
GRMZM2G004694	257805_at	AT3G18830
GRMZM2G004699	250214_at	AT5G13870
GRMZM2G004709	248811_at	AT5G47310
GRMZM2G004741	260787_at	AT1G06230
GRMZM2G004748	254034_at	AT4G25960
GRMZM2G004768	259052_at	AT3G03490
GRMZM2G004828	257064_at	AT3G18260
GRMZM2G004847	246384_at	AT1G77370
GRMZM2G004878	262840_at	AT1G14900
GRMZM2G004880	254460_at	AT4G21210
GRMZM2G004909	257066_at	AT3G18280
GRMZM2G004946	245958_at	AT5G19610
GRMZM2G004959	264462_at	AT1G10200
GRMZM2G004990	261451_at	AT1G21060
GRMZM2G004996	265044_at	AT1G03950
GRMZM2G005036	265056_at	AT1G51980
GRMZM2G005061	259938_at	AT1G71310
GRMZM2G005080	256795_at	AT3G22110
GRMZM2G005082	247963_at	AT5G56590
GRMZM2G005107	257686_at	AT3G12800
GRMZM2G005163	247687_at	AT5G59740
GRMZM2G005187	266345_at	AT2G01410
GRMZM2G005195	264351_at	AT1G03370
GRMZM2G005209	267442_at	AT2G19080
GRMZM2G005233	261212_at	AT1G12880
GRMZM2G005256	253975_at	AT4G26600
GRMZM2G005298	257667_at	AT3G20440
GRMZM2G005304	248927_at	AT5G45900
GRMZM2G005308	247046_at	AT5G66540
GRMZM2G005339	250993_at	AT5G02280
GRMZM2G005346	255010_at	AT4G10050
GRMZM2G005350	251786_at	AT3G55270
GRMZM2G005384	250481_at	AT5G10310
GRMZM2G005435	261740_at	AT1G47740
GRMZM2G005444	262561_at	AT1G34340
GRMZM2G005459	255411_at	AT4G03110
GRMZM2G005486	262758_at	AT1G10780
GRMZM2G005554	250189_at	AT5G14410
GRMZM2G005562	251831_at	AT3G55140
GRMZM2G005583	255025_at	AT4G09900
GRMZM2G005622	256236_at	AT3G12350
GRMZM2G005646	254352_at	AT4G22320
GRMZM2G005652	253647_at	AT4G29950
GRMZM2G005710	256453_at	AT1G75270
GRMZM2G005737	267268_at	AT2G02570
GRMZM2G005749	248387_at	AT5G51960
GRMZM2G005753	260445_at	AT1G68370
GRMZM2G005771	250129_at	AT5G16450
GRMZM2G005788	252850_at	AT4G39880
GRMZM2G005791	253615_at	AT4G30360
GRMZM2G005834	251710_at	AT3G56930
GRMZM2G005844	260669_at	AT1G19340
GRMZM2G005848	257044_at	AT3G19720
GRMZM2G005849	256911_at	AT3G24090
GRMZM2G005859	254691_at	AT4G17840
GRMZM2G005869	258682_at	AT3G08720
GRMZM2G005887	245286_at	AT4G14880
GRMZM2G005938	251496_at	AT3G59040
GRMZM2G005939	263467_at	AT2G31730
GRMZM2G005947	258165_at	AT3G17900
GRMZM2G005973	251120_at	AT3G63490
GRMZM2G005980	260331_at	AT1G80270
GRMZM2G005991	262317_at	AT2G48140
GRMZM2G005998	266962_at	AT2G39440
GRMZM2G006006	246057_at	AT5G08400
GRMZM2G006069	249248_at	AT5G42320
GRMZM2G006080	252066_at	AT3G51550
GRMZM2G006085	249959_at	AT5G18800
GRMZM2G006121	258587_at	AT3G04310
GRMZM2G006130	258774_at	AT3G10740
GRMZM2G006144	248613_at	AT5G49555
GRMZM2G006197	261773_at	AT1G76250
GRMZM2G006229	253782_at	AT4G28590
GRMZM2G006234	264591_at	AT2G17670
GRMZM2G006246	258477_at	AT3G02680
GRMZM2G006277	257741_at	AT3G27340
GRMZM2G006287	255921_at	AT1G22240
GRMZM2G006297	249703_at	AT5G35560
GRMZM2G006377	264687_at	AT1G09850
GRMZM2G006450	258447_at	AT3G22450
GRMZM2G006452	252416_at	AT3G47460
GRMZM2G006474	262614_at	AT1G13980
GRMZM2G006565	266532_at	AT2G16890
GRMZM2G006578	250701_at	AT5G06839
GRMZM2G006661	250363_at	AT5G11390
GRMZM2G006672	253196_at	AT4G35260
GRMZM2G006673	250459_at	AT5G09860
GRMZM2G006704	247520_at	AT5G61310
GRMZM2G006716	250680_at	AT5G06570
GRMZM2G006745	250781_at	AT5G05410
GRMZM2G006752	260064_at	AT1G73730
GRMZM2G006763	249222_at	AT5G42450
GRMZM2G006781	250297_at	AT5G11980
GRMZM2G006790	253963_at	AT4G26470
GRMZM2G006806	260069_at	AT1G73820
GRMZM2G006894	266939_at	AT2G18960
GRMZM2G006942	264407_at	AT1G10180
GRMZM2G006948	248006_at	AT5G56250
GRMZM2G006964	254459_at	AT4G21200
GRMZM2G006977	253063_at	AT4G37640
GRMZM2G007021	267277_at	AT2G30050
GRMZM2G007038	262483_at	AT1G17220
GRMZM2G007103	253726_at	AT4G29430
GRMZM2G007120	261336_at	AT1G44790
GRMZM2G007130	253055_at	AT4G37630
GRMZM2G007146	258699_at	AT3G09470
GRMZM2G007157	254547_at	AT4G19860
GRMZM2G007160	255012_at	AT4G10030
GRMZM2G007229	264329_at	AT1G04140
GRMZM2G007249	265194_at	AT1G05010
GRMZM2G007258	257127_at	AT3G20070
GRMZM2G007283	251122_at	AT5G01020
GRMZM2G007288	260747_at	AT1G78420
GRMZM2G007441	245123_at	AT2G47450
GRMZM2G007453	262860_at	AT1G64810
GRMZM2G007466	260562_at	AT2G43850
GRMZM2G007486	246980_at	AT5G67530
GRMZM2G007590	255871_at	AT2G30260
GRMZM2G007630	262519_at	AT1G17160
GRMZM2G007651	259342_at	AT3G03890
GRMZM2G007675	248129_at	AT5G54780
GRMZM2G007681	261100_at	AT1G63020
GRMZM2G007683	263703_at	AT1G31170
GRMZM2G007695	258715_at	AT3G09630
GRMZM2G007721	258556_at	AT3G07020
GRMZM2G007729	248434_at	AT5G51440
GRMZM2G007757	263863_at	AT2G04540
GRMZM2G007871	262053_at	AT1G79940
GRMZM2G007899	251369_at	AT3G60480
GRMZM2G007915	249926_at	AT5G19180
GRMZM2G007933	257055_at	AT3G15351
GRMZM2G007953	262951_at	AT1G75500
GRMZM2G007957	263075_at	AT2G17570
GRMZM2G008060	262095_at	AT1G56090
GRMZM2G008093	251907_at	AT3G53760
GRMZM2G008123	249595_at	AT5G37930
GRMZM2G008152	263562_at	AT2G15420
GRMZM2G008216	246702_at	AT5G28050
GRMZM2G008226	263019_at	AT1G23870
GRMZM2G008232	255498_at	AT4G02620
GRMZM2G008252	262285_at	AT1G68680
GRMZM2G008263	261191_at	AT1G32900
GRMZM2G008273	250188_at	AT5G14250
GRMZM2G008290	250944_at	AT5G03380
GRMZM2G008309	264879_at	AT1G61260
GRMZM2G008327	252337_at	AT3G48750
GRMZM2G008374	265685_at	AT2G24430
GRMZM2G008406	254024_at	AT4G25780
GRMZM2G008410	250843_at	AT5G04430
GRMZM2G008425	246881_at	AT5G26040
GRMZM2G008490	257236_at	AT3G15095
GRMZM2G008607	256061_at	AT1G07040
GRMZM2G008657	248341_at	AT5G52220
GRMZM2G008663	248900_at	AT5G46400
GRMZM2G008665	253325_at	AT4G33925
GRMZM2G008687	261822_at	AT1G11380
GRMZM2G008714	250526_at	AT5G08570
GRMZM2G008728	254393_at	AT4G21580
GRMZM2G008751	258811_at	AT3G03990
GRMZM2G008859	263298_at	AT2G15290
GRMZM2G008864	249158_at	AT5G43430
GRMZM2G008919	261178_at	AT1G04760
GRMZM2G009019	260199_at	AT1G67590
GRMZM2G009021	251867_at	AT3G54480
GRMZM2G009030	260392_at	AT1G74030
GRMZM2G009060	258807_at	AT3G04030
GRMZM2G009070	260292_at	AT1G63680
GRMZM2G009125	255942_at	AT1G22360
GRMZM2G009144	257946_at	AT3G21710
GRMZM2G009196	265389_at	AT2G20690
GRMZM2G009214	257663_at	AT3G20260
GRMZM2G009253	253959_at	AT4G26410
GRMZM2G009282	262230_at	AT1G68560
GRMZM2G009323	253274_at	AT4G34200
GRMZM2G009326	245667_at	AT1G28200
GRMZM2G009344	245661_at	AT1G28220
GRMZM2G009353	263699_at	AT1G31120
GRMZM2G009365	247399_at	AT5G62960
GRMZM2G009413	264357_at	AT1G03360
GRMZM2G009464	247593_at	AT5G60790
GRMZM2G009479	252618_at	AT3G45140
GRMZM2G009538	252174_at	AT3G50690
GRMZM2G009563	248463_at	AT5G51130
GRMZM2G009571	246737_at	AT5G27710
GRMZM2G009627	247250_at	AT5G64630
GRMZM2G009653	260946_at	AT1G06010
GRMZM2G009703	253756_at	AT4G28980
GRMZM2G009715	255304_at	AT4G04850
GRMZM2G009719	251221_at	AT3G62550
GRMZM2G009785	253394_at	AT4G32770
GRMZM2G009795	247295_at	AT5G64180
GRMZM2G009843	252026_at	AT3G53030
GRMZM2G009871	258776_at	AT3G11830
GRMZM2G009895	258345_at	AT3G22845
GRMZM2G009913	255790_at	AT2G33560
GRMZM2G009928	267219_at	AT2G02590
GRMZM2G009940	254928_at	AT4G11410
GRMZM2G009948	260397_at	AT1G69680
GRMZM2G009958	265478_at	AT2G15890
GRMZM2G009968	247830_at	AT5G58530
GRMZM2G009994	261632_at	AT1G50120
GRMZM2G009995	261527_at	AT1G14390
GRMZM2G010017	252992_at	AT4G38520
GRMZM2G010034	264738_at	AT1G62250
GRMZM2G010037	249625_at	AT5G37480
GRMZM2G010046	263719_at	AT2G13600
GRMZM2G010054	264309_at	AT1G62020
GRMZM2G010056	257907_at	AT3G25470
GRMZM2G010085	249997_at	AT5G18620
GRMZM2G010100	245966_at	AT5G19790
GRMZM2G010105	264630_at	AT1G65470
GRMZM2G010136	259111_at	AT3G05520
GRMZM2G010146	265148_at	AT1G51160
GRMZM2G010152	249027_at	AT5G44790
GRMZM2G010196	247862_at	AT5G58250
GRMZM2G010221	245532_at	AT4G15110
GRMZM2G010235	250289_at	AT5G13190
GRMZM2G010238	261044_at	AT1G01290
GRMZM2G010298	257050_at	AT3G15260
GRMZM2G010302	267078_at	AT2G40960
GRMZM2G010306	261364_at	AT1G53140
GRMZM2G010315	256242_at	AT3G12380
GRMZM2G010321	266517_at	AT2G35120
GRMZM2G010328	253308_at	AT4G33680
GRMZM2G010342	263349_at	AT2G13370
GRMZM2G010348	255011_at	AT4G10040
GRMZM2G010349	260036_at	AT1G68830
GRMZM2G010353	251856_at	AT3G54720
GRMZM2G010357	247695_at	AT5G59710
GRMZM2G010362	247428_at	AT5G62600
GRMZM2G010406	254134_at	AT4G24830
GRMZM2G010433	250161_at	AT5G15240
GRMZM2G010468	267470_at	AT2G30490
GRMZM2G010488	266911_at	AT2G45910
GRMZM2G010551	263898_at	AT2G21950
GRMZM2G010596	266598_at	AT2G46110
GRMZM2G010628	247556_at	AT5G61040
GRMZM2G010640	265102_at	AT1G30870
GRMZM2G010649	255018_at	AT4G10090
GRMZM2G010664	259798_at	AT1G64310
GRMZM2G010693	264930_at	AT1G60800
GRMZM2G010714	265840_at	AT2G14530
GRMZM2G010754	264094_at	AT1G79200
GRMZM2G010775	261523_at	AT1G71860
GRMZM2G010797	260899_at	AT1G21370
GRMZM2G010801	257903_at	AT3G28460
GRMZM2G010834	264535_at	AT1G55690
GRMZM2G010863	248556_at	AT5G50350
GRMZM2G010884	265033_at	AT1G61520
GRMZM2G010920	257855_at	AT3G13040
GRMZM2G010929	266813_at	AT2G44920
GRMZM2G010933	257058_at	AT3G15352
GRMZM2G010937	249720_at	AT5G35700
GRMZM2G010944	247847_at	AT5G58110
GRMZM2G010987	257205_at	AT3G16520
GRMZM2G011030	265934_at	AT2G19560
GRMZM2G011031	252231_at	AT3G49720
GRMZM2G011068	266653_at	AT2G25740
GRMZM2G011085	245975_at	AT5G13070
GRMZM2G011098	252908_at	AT4G39670
GRMZM2G011129	254126_at	AT4G24770
GRMZM2G011136	258015_at	AT3G19340
GRMZM2G011173	261693_at	AT1G08370
GRMZM2G011219	257732_at	AT3G18480
GRMZM2G011269	260155_at	AT1G52870
GRMZM2G011314	256191_at	AT1G30130
GRMZM2G011319	260089_at	AT1G73170
GRMZM2G011364	266350_at	AT2G01470
GRMZM2G011373	259658_at	AT1G55370
GRMZM2G011401	262040_at	AT1G80080
GRMZM2G011404	261183_at	AT1G34550
GRMZM2G011479	264728_at	AT1G22850
GRMZM2G011483	246849_at	AT5G26850
GRMZM2G011491	253116_at	AT4G35850
GRMZM2G011513	260083_at	AT1G63220
GRMZM2G011520	250923_at	AT5G03455
GRMZM2G011526	261434_at	AT1G07650
GRMZM2G011553	254180_at	AT4G23930
GRMZM2G011615	249273_at	AT5G41850
GRMZM2G011624	246518_at	AT5G15770
GRMZM2G011627	264229_at	AT1G67480
GRMZM2G011631	261811_at	AT1G08260
GRMZM2G011662	251319_at	AT3G61610
GRMZM2G011742	258455_at	AT3G22440
GRMZM2G011743	255684_at	AT4G00590
GRMZM2G011746	262791_at	AT1G10830
GRMZM2G011777	256722_at	AT2G34050
GRMZM2G011806	262360_at	AT1G73080
GRMZM2G011878	247817_at	AT5G58375
GRMZM2G011893	254082_at	AT4G25720
GRMZM2G011912	265845_at	AT2G35610
GRMZM2G011915	262641_at	AT1G62730
GRMZM2G011932	266555_at	AT2G46270
GRMZM2G011998	254176_at	AT4G24200
GRMZM2G012030	263112_at	AT1G03080
GRMZM2G012031	267310_at	AT2G34680
GRMZM2G012041	260873_at	AT1G21580
GRMZM2G012102	267379_at	AT2G26340
GRMZM2G012119	258223_at	AT3G15840
GRMZM2G012126	253303_at	AT4G33780
GRMZM2G012143	251855_at	AT3G54690
GRMZM2G012174	248547_at	AT5G50280
GRMZM2G012176	264226_at	AT1G67510
GRMZM2G012209	247449_at	AT5G62290
GRMZM2G012224	258641_at	AT3G08030
GRMZM2G012262	259942_at	AT1G71260
GRMZM2G012269	255951_at	AT1G22050
GRMZM2G012276	258087_at	AT3G26060
GRMZM2G012319	265778_at	AT2G07360
GRMZM2G012324	251031_at	AT5G02120
GRMZM2G012328	248593_at	AT5G49180
GRMZM2G012340	253973_at	AT4G26555
GRMZM2G012391	250752_at	AT5G05690
GRMZM2G012397	256309_at	AT1G30380
GRMZM2G012399	260128_at	AT1G36310
GRMZM2G012404	258475_at	AT3G02660
GRMZM2G012413	253156_at	AT4G35730
GRMZM2G012479	264383_at	AT2G25080
GRMZM2G012601	245521_at	AT4G15880
GRMZM2G012654	265667_at	AT2G27470
GRMZM2G012728	245696_at	AT5G04190
GRMZM2G012814	258637_at	AT3G07880
GRMZM2G012874	265463_at	AT2G37090
GRMZM2G012901	250380_at	AT5G11600
GRMZM2G012958	247221_at	AT5G64813
GRMZM2G012970	267054_at	AT2G38370
GRMZM2G012992	248039_at	AT5G55950
GRMZM2G012999	250554_at	AT5G07900
GRMZM2G013042	258976_at	AT3G01980
GRMZM2G013079	262188_at	AT1G77810
GRMZM2G013082	249881_at	AT5G23190
GRMZM2G013152	258998_at	AT3G01820
GRMZM2G013176	260638_at	AT1G62390
GRMZM2G013201	262536_at	AT1G17100
GRMZM2G013236	245775_at	AT1G30270
GRMZM2G013318	256207_at	AT1G50920
GRMZM2G013324	253925_at	AT4G26690
GRMZM2G013342	255457_at	AT4G02770
GRMZM2G013349	261753_at	AT1G76340
GRMZM2G013357	253097_at	AT4G37320
GRMZM2G013391	260882_at	AT1G29280
GRMZM2G013398	259244_at	AT3G07650
GRMZM2G013456	265790_at	AT2G01170
GRMZM2G013461	256235_at	AT3G12490
GRMZM2G013463	251035_at	AT5G02220
GRMZM2G013478	247376_at	AT5G63310
GRMZM2G013546	254356_at	AT4G22190
GRMZM2G013588	248641_at	AT5G49110
GRMZM2G013600	248386_at	AT5G51940
GRMZM2G013617	249309_at	AT5G41410
GRMZM2G013634	248376_at	AT5G51880
GRMZM2G013639	251270_at	AT3G62370
GRMZM2G013650	261952_at	AT1G64430
GRMZM2G013657	260498_at	AT2G41710
GRMZM2G013695	251815_at	AT3G54900
GRMZM2G013704	254950_at	AT4G10810
GRMZM2G013726	249215_at	AT5G42800
GRMZM2G013728	263171_at	AT1G54115
GRMZM2G013750	247257_at	AT5G64760
GRMZM2G013765	261233_at	AT1G32810
GRMZM2G013783	257880_at	AT3G16910
GRMZM2G013811	247216_at	AT5G64860
GRMZM2G013814	252122_at	AT3G51140
GRMZM2G013890	262005_at	AT1G64550
GRMZM2G013892	258823_at	AT3G07200
GRMZM2G013908	261126_at	AT1G04950
GRMZM2G013936	248081_at	AT5G55390
GRMZM2G013970	248172_at	AT5G54660
GRMZM2G014004	266448_s_at	AT2G43210
GRMZM2G014022	263283_at	AT2G36090
GRMZM2G014043	267224_at	AT2G43990
GRMZM2G014069	256862_at	AT3G23940
GRMZM2G014076	258329_at	AT3G16110
GRMZM2G014091	266074_at	AT2G18740
GRMZM2G014099	256698_at	AT3G20680
GRMZM2G014170	264625_at	AT1G09020
GRMZM2G014193	254729_at	AT4G13700
GRMZM2G014276	246457_at	AT5G16750
GRMZM2G014295	266852_at	AT2G26810
GRMZM2G014313	254830_at	AT4G12590
GRMZM2G014341	251650_at	AT3G57360
GRMZM2G014376	258908_at	AT3G06350
GRMZM2G014382	256267_at	AT3G12260
GRMZM2G014387	261267_at	AT1G26750
GRMZM2G014392	260797_at	AT1G78390
GRMZM2G014400	258644_at	AT3G07810
GRMZM2G014409	245864_at	AT1G58070
GRMZM2G014454	266963_at	AT2G39450
GRMZM2G014499	248961_at	AT5G45650
GRMZM2G014508	266958_at	AT2G34630
GRMZM2G014558	260592_at	AT1G55850
GRMZM2G014612	248500_at	AT5G50410
GRMZM2G014653	261564_at	AT1G01720
GRMZM2G014676	249829_at	AT5G23290
GRMZM2G014709	266197_at	AT2G39120
GRMZM2G014720	246306_at	AT3G51780
GRMZM2G014788	251269_at	AT3G62360
GRMZM2G014793	259333_at	AT3G03810
GRMZM2G014805	250693_at	AT5G06600
GRMZM2G014813	254445_at	AT4G20930
GRMZM2G014826	265935_at	AT2G19580
GRMZM2G014917	267551_at	AT2G32780
GRMZM2G014977	249470_at	AT5G39350
GRMZM2G015005	255225_at	AT4G05410
GRMZM2G015011	257982_at	AT3G20780
GRMZM2G015033	256856_at	AT3G15110
GRMZM2G015049	257460_at	AT1G75580
GRMZM2G015067	258164_at	AT3G17910
GRMZM2G015090	258390_at	AT3G15410
GRMZM2G015100	264818_at	AT1G03530
GRMZM2G015126	250879_at	AT5G04060
GRMZM2G015132	262963_at	AT1G54220
GRMZM2G015200	259533_at	AT1G12530
GRMZM2G015219	264449_at	AT1G27460
GRMZM2G015238	261770_at	AT1G76140
GRMZM2G015281	260856_at	AT1G21910
GRMZM2G015285	258295_at	AT3G23400
GRMZM2G015289	256174_at	AT1G51720
GRMZM2G015291	248817_at	AT5G47020
GRMZM2G015295	245356_at	AT4G13940
GRMZM2G015344	263929_at	AT2G36310
GRMZM2G015364	256173_at	AT1G51730
GRMZM2G015384	261672_at	AT1G18450
GRMZM2G015502	255821_at	AT2G40570
GRMZM2G015571	247233_at	AT5G64970
GRMZM2G015588	258782_at	AT3G11750
GRMZM2G015592	245054_at	AT2G26460
GRMZM2G015596	258928_at	AT3G10070
GRMZM2G015605	258735_at	AT3G05880
GRMZM2G015642	250768_at	AT5G05670
GRMZM2G015708	261503_at	AT1G71691
GRMZM2G015727	257207_at	AT3G14900
GRMZM2G015730	248471_at	AT5G50840
GRMZM2G015784	247281_at	AT5G64350
GRMZM2G015793	250549_at	AT5G07860
GRMZM2G015804	261016_at	AT1G26560
GRMZM2G015854	257783_at	AT3G26950
GRMZM2G015861	251340_at	AT3G60830
GRMZM2G015869	249373_at	AT5G40670
GRMZM2G015875	264996_at	AT1G67230
GRMZM2G015880	248378_at	AT5G51840
GRMZM2G015902	259415_at	AT1G02330
GRMZM2G015906	252075_at	AT3G51730
GRMZM2G015925	257211_at	AT3G15080
GRMZM2G015967	259193_at	AT3G01480
GRMZM2G015976	249800_at	AT5G23660
GRMZM2G016066	265287_at	AT2G20260
GRMZM2G016084	257172_at	AT3G23700
GRMZM2G016150	245925_at	AT5G28770
GRMZM2G016168	258283_at	AT3G26750
GRMZM2G016184	262559_at	AT1G31300
GRMZM2G016236	262634_at	AT1G06690
GRMZM2G016323	247838_at	AT5G57990
GRMZM2G016382	266853_at	AT2G26790
GRMZM2G016435	258339_at	AT3G16120
GRMZM2G016443	263211_at	AT1G10460
GRMZM2G016457	246958_at	AT5G24690
GRMZM2G016487	261127_at	AT1G04790
GRMZM2G016521	247913_at	AT5G57510
GRMZM2G016546	251537_at	AT3G58470
GRMZM2G016586	251795_at	AT3G55390
GRMZM2G016602	264099_at	AT1G79050
GRMZM2G016660	250545_at	AT5G08160
GRMZM2G016774	257196_at	AT3G23790
GRMZM2G016819	251530_at	AT3G58520
GRMZM2G016827	263589_at	AT2G25280
GRMZM2G016844	253847_at	AT4G28010
GRMZM2G016858	246312_at	AT1G31930
GRMZM2G016866	257838_at	AT3G25210
GRMZM2G016878	251171_at	AT3G63220
GRMZM2G016923	251332_at	AT3G61670
GRMZM2G016928	256434_at	AT3G10950
GRMZM2G016939	266812_at	AT2G44830
GRMZM2G016958	258610_at	AT3G02875
GRMZM2G017045	265569_at	AT2G05620
GRMZM2G017047	249044_at	AT5G44370
GRMZM2G017077	264158_at	AT1G65260
GRMZM2G017080	252822_at	AT4G39955
GRMZM2G017081	250369_at	AT5G11300
GRMZM2G017086	256179_at	AT1G51710
GRMZM2G017089	245358_at	AT4G15900
GRMZM2G017159	246139_at	AT5G19900
GRMZM2G017187	262914_at	AT1G59750
GRMZM2G017193	254758_at	AT4G13260
GRMZM2G017237	251160_at	AT3G63240
GRMZM2G017249	249378_at	AT5G40450
GRMZM2G017257	250429_at	AT5G10470
GRMZM2G017269	246593_at	AT5G14790
GRMZM2G017290	262557_at	AT1G31330
GRMZM2G017299	253921_at	AT4G26900
GRMZM2G017305	260289_at	AT1G80350
GRMZM2G017329	248813_at	AT5G46860
GRMZM2G017349	246212_at	AT4G36930
GRMZM2G017365	256272_at	AT3G12100
GRMZM2G017404	245517_at	AT4G15840
GRMZM2G017405	257094_at	AT3G20480
GRMZM2G017409	259074_at	AT3G02130
GRMZM2G017421	263728_at	AT1G60070
GRMZM2G017460	262453_at	AT1G11240
GRMZM2G017536	251527_at	AT3G58650
GRMZM2G017537	256812_at	AT3G21350
GRMZM2G017555	258888_at	AT3G05620
GRMZM2G017586	248171_at	AT5G54680
GRMZM2G017616	261037_at	AT1G17420
GRMZM2G017624	267186_at	AT2G44090
GRMZM2G017647	245795_at	AT1G32160
GRMZM2G017671	258601_at	AT3G02760
GRMZM2G017741	259325_at	AT3G05320
GRMZM2G017804	246733_at	AT5G27660
GRMZM2G017831	246206_at	AT4G36650
GRMZM2G017845	256013_at	AT1G19270
GRMZM2G017853	266192_at	AT2G39080
GRMZM2G017923	263526_at	AT2G24830
GRMZM2G017933	248966_at	AT5G45360
GRMZM2G018006	248425_at	AT5G51690
GRMZM2G018020	245124_at	AT2G47580
GRMZM2G018044	250446_at	AT5G10770
GRMZM2G018070	263325_at	AT2G04240
GRMZM2G018074	251845_at	AT3G54540
GRMZM2G018103	261843_at	AT1G16180
GRMZM2G018217	260981_at	AT1G53460
GRMZM2G018223	250244_at	AT5G13680
GRMZM2G018229	247497_at	AT5G61770
GRMZM2G018238	263239_at	AT2G16570
GRMZM2G018251	253889_at	AT4G27760
GRMZM2G018275	252880_at	AT4G39730
GRMZM2G018280	260633_at	AT1G62400
GRMZM2G018281	260543_at	AT2G43330
GRMZM2G018356	254892_at	AT4G11800
GRMZM2G018398	262197_at	AT1G53910
GRMZM2G018403	262029_at	AT1G35680
GRMZM2G018447	260964_at	AT1G45050
GRMZM2G018484	263533_at	AT2G24820
GRMZM2G018485	266760_at	AT2G46870
GRMZM2G018579	263840_at	AT2G36885
GRMZM2G018586	264708_at	AT1G09740
GRMZM2G018612	267380_at	AT2G26170
GRMZM2G018689	258996_at	AT3G01800
GRMZM2G018695	251379_at	AT3G60680
GRMZM2G018721	260337_at	AT1G69310
GRMZM2G018728	251707_at	AT3G56490
GRMZM2G018771	262573_at	AT1G15390
GRMZM2G018775	246066_at	AT5G19400
GRMZM2G018820	258856_at	AT3G02040
GRMZM2G018869	259755_at	AT1G71070
GRMZM2G018885	256286_at	AT3G12180
GRMZM2G018929	253208_at	AT4G34830
GRMZM2G018947	257023_at	AT3G19760
GRMZM2G018951	265068_at	AT1G55550
GRMZM2G018962	252980_at	AT4G38040
GRMZM2G018988	266590_at	AT2G46240
GRMZM2G019050	248223_at	AT5G53620
GRMZM2G019060	253056_at	AT4G37650
GRMZM2G019084	255499_at	AT4G02730
GRMZM2G019119	248726_at	AT5G47960
GRMZM2G019121	253561_at	AT4G31180
GRMZM2G019166	254703_at	AT4G17960
GRMZM2G019177	253343_at	AT4G33540
GRMZM2G019183	260010_at	AT1G68020
GRMZM2G019200	259450_at	AT1G13870
GRMZM2G019236	253448_at	AT4G32640
GRMZM2G019257	252936_at	AT4G39160
GRMZM2G019260	246286_at	AT1G31910
GRMZM2G019267	250451_at	AT5G10270
GRMZM2G019284	260700_at	AT1G32260
GRMZM2G019317	246483_at	AT5G16000
GRMZM2G019335	263252_at	AT2G31380
GRMZM2G019356	248419_at	AT5G51550
GRMZM2G019358	254642_at	AT4G18810
GRMZM2G019363	253182_at	AT4G35190
GRMZM2G019411	258193_at	AT3G29090
GRMZM2G019437	256361_at	AT1G66520
GRMZM2G019450	251712_at	AT3G56120
GRMZM2G019501	264205_at	AT1G22790
GRMZM2G019538	260725_at	AT1G48170
GRMZM2G019553	262591_at	AT1G15220
GRMZM2G019567	258367_at	AT3G14370
GRMZM2G019571	261003_at	AT1G26500
GRMZM2G019586	247425_at	AT5G62550
GRMZM2G019597	246965_at	AT5G24840
GRMZM2G019621	254115_at	AT4G24710
GRMZM2G019673	253286_at	AT4G34260
GRMZM2G019681	249861_at	AT5G22875
GRMZM2G019695	249182_at	AT5G42960
GRMZM2G019738	252405_at	AT3G48120
GRMZM2G019744	247670_at	AT5G60190
GRMZM2G019777	251061_at	AT5G01830
GRMZM2G019783	266157_at	AT2G28100
GRMZM2G019806	253070_at	AT4G37850
GRMZM2G019838	249404_at	AT5G40160
GRMZM2G019863	258944_at	AT3G10390
GRMZM2G019866	259095_at	AT3G05020
GRMZM2G019874	250508_at	AT5G09950
GRMZM2G019876	251985_at	AT3G53220
GRMZM2G019901	246019_at	AT5G10690
GRMZM2G019919	266870_at	AT2G44710
GRMZM2G019926	263118_at	AT1G03090
GRMZM2G019958	247166_at	AT5G65840
GRMZM2G019971	260973_at	AT1G53490
GRMZM2G019974	264124_at	AT1G79360
GRMZM2G019986	267432_at	AT2G35020
GRMZM2G019991	266405_at	AT2G38580
GRMZM2G020002	250318_at	AT5G12200
GRMZM2G020008	248315_at	AT5G52630
GRMZM2G020034	255737_at	AT1G25420
GRMZM2G020040	245293_at	AT4G16660
GRMZM2G020081	247525_at	AT5G61380
GRMZM2G020091	252591_at	AT3G45600
GRMZM2G020096	254270_at	AT4G23100
GRMZM2G020140	246772_at	AT5G27490
GRMZM2G020146	252606_at	AT3G45010
GRMZM2G020156	248772_at	AT5G47800
GRMZM2G020187	249843_at	AT5G23570
GRMZM2G020201	247375_at	AT5G63135
GRMZM2G020255	265442_at	AT2G20940
GRMZM2G020281	254376_at	AT4G21790
GRMZM2G020291	263779_at	AT2G46340
GRMZM2G020295	254686_at	AT4G13720
GRMZM2G020366	251367_at	AT3G61350
GRMZM2G020401	265386_at	AT2G20930
GRMZM2G020484	251882_at	AT3G54140
GRMZM2G020544	264669_at	AT1G09630
GRMZM2G020574	260321_at	AT1G63900
GRMZM2G020606	249990_at	AT5G18540
GRMZM2G020620	254613_at	AT4G19150
GRMZM2G020631	264928_at	AT1G60710
GRMZM2G020653	246749_at	AT5G27830
GRMZM2G020721	248907_at	AT5G46340
GRMZM2G020766	258860_at	AT3G02050
GRMZM2G020775	253980_at	AT4G26620
GRMZM2G020799	258306_at	AT3G30530
GRMZM2G020805	254670_at	AT4G18390
GRMZM2G020856	266100_at	AT2G37980
GRMZM2G020859	254305_at	AT4G22200
GRMZM2G020864	262763_at	AT1G28690
GRMZM2G020920	259488_at	AT1G15780
GRMZM2G020996	247615_at	AT5G60250
GRMZM2G021074	263159_at	AT1G54130
GRMZM2G021110	253704_at	AT4G29490
GRMZM2G021170	251442_at	AT3G59980
GRMZM2G021219	250461_at	AT5G10010
GRMZM2G021233	265191_at	AT1G05120
GRMZM2G021256	262612_at	AT1G14150
GRMZM2G021270	256864_at	AT3G23890
GRMZM2G021319	266028_at	AT2G06000
GRMZM2G021339	259165_at	AT3G01470
GRMZM2G021406	250346_at	AT5G11950
GRMZM2G021422	264393_at	AT1G11880
GRMZM2G021439	245380_at	AT4G17760
GRMZM2G021464	257001_at	AT3G14080
GRMZM2G021470	249085_at	AT5G44170
GRMZM2G021483	251203_at	AT3G63070
GRMZM2G021517	254167_at	AT4G24400
GRMZM2G021530	250632_at	AT5G07450
GRMZM2G021549	249084_at	AT5G44150
GRMZM2G021567	247607_at	AT5G60960
GRMZM2G021589	254969_at	AT4G10360
GRMZM2G021605	255924_at	AT1G22170
GRMZM2G021619	257902_at	AT3G28450
GRMZM2G021635	251557_at	AT3G58730
GRMZM2G021642	255634_at	AT4G00650
GRMZM2G021687	267430_at	AT2G34860
GRMZM2G021694	257966_at	AT3G19800
GRMZM2G021704	254267_at	AT4G22930
GRMZM2G021710	260826_at	AT1G06710
GRMZM2G021742	264678_at	AT1G09760
GRMZM2G021786	256615_at	AT3G22250
GRMZM2G021802	257829_at	AT3G26680
GRMZM2G021816	256663_at	AT3G12050
GRMZM2G021822	257086_at	AT3G20490
GRMZM2G021846	256036_at	AT1G07110
GRMZM2G021864	253089_at	AT4G36290
GRMZM2G021885	261853_at	AT1G50660
GRMZM2G021889	247225_at	AT5G65090
GRMZM2G021912	255923_at	AT1G22180
GRMZM2G022019	249712_at	AT5G35620
GRMZM2G022032	263459_at	AT2G31820
GRMZM2G022041	249003_at	AT5G44500
GRMZM2G022052	254463_at	AT4G20280
GRMZM2G022061	246285_at	AT4G36980
GRMZM2G022065	256887_at	AT3G15150
GRMZM2G022107	258581_at	AT3G04160
GRMZM2G022130	248242_at	AT5G53580
GRMZM2G022181	256014_at	AT1G19200
GRMZM2G022192	256728_at	AT3G25660
GRMZM2G022229	259056_at	AT3G03420
GRMZM2G022252	263902_at	AT2G36230
GRMZM2G022258	246424_at	AT5G17020
GRMZM2G022275	262145_at	AT1G52730
GRMZM2G022298	246755_at	AT5G27920
GRMZM2G022308	254730_at	AT4G13730
GRMZM2G022310	252617_at	AT3G45100
GRMZM2G022311	254575_at	AT4G19460
GRMZM2G022318	256402_at	AT3G06130
GRMZM2G022368	250301_at	AT5G11970
GRMZM2G022499	251615_at	AT3G57980
GRMZM2G022506	260215_at	AT1G74530
GRMZM2G022558	267606_at	AT2G26640
GRMZM2G022563	265120_at	AT1G62640
GRMZM2G022611	251183_at	AT3G62630
GRMZM2G022625	250383_at	AT5G11480
GRMZM2G022629	258493_at	AT3G02555
GRMZM2G022662	253988_at	AT4G26310
GRMZM2G022679	260773_at	AT1G78440
GRMZM2G022694	255147_at	AT4G08460
GRMZM2G022787	258334_at	AT3G16010
GRMZM2G022793	259963_at	AT1G53660
GRMZM2G022799	245697_at	AT5G04200
GRMZM2G022837	261428_at	AT1G18870
GRMZM2G022856	255378_at	AT4G03550
GRMZM2G022859	262990_at	AT1G23260
GRMZM2G022866	250867_at	AT5G03880
GRMZM2G022876	248287_at	AT5G52970
GRMZM2G022897	255738_at	AT1G25570
GRMZM2G022904	264470_at	AT1G67110
GRMZM2G022921	266734_at	AT2G46900
GRMZM2G022931	250933_at	AT5G03170
GRMZM2G022934	267128_at	AT2G23620
GRMZM2G022974	251477_at	AT3G59680
GRMZM2G023008	266694_at	AT2G19790
GRMZM2G023028	257929_at	AT3G16980
GRMZM2G023037	253622_at	AT4G30560
GRMZM2G023071	260273_at	AT1G80550
GRMZM2G023080	259604_at	AT1G56450
GRMZM2G023133	267192_at	AT2G30890
GRMZM2G023163	260274_at	AT1G80460
GRMZM2G023204	257840_at	AT3G25250
GRMZM2G023220	260297_at	AT1G80280
GRMZM2G023239	250405_at	AT5G10790
GRMZM2G023242	255902_at	AT1G17880
GRMZM2G023313	263282_at	AT2G14095
GRMZM2G023346	248740_at	AT5G48130
GRMZM2G023387	261821_at	AT1G11530
GRMZM2G023418	259872_at	AT1G76810
GRMZM2G023422	256204_at	AT1G50840
GRMZM2G023444	248060_at	AT5G55560
GRMZM2G023520	255477_at	AT4G02370
GRMZM2G023528	247641_at	AT5G60540
GRMZM2G023575	265207_at	AT2G36680
GRMZM2G023585	255128_at	AT4G08310
GRMZM2G023625	252637_at	AT3G44530
GRMZM2G023652	263957_at	AT2G35880
GRMZM2G023708	250231_at	AT5G13910
GRMZM2G023715	261399_at	AT1G79620
GRMZM2G023769	260499_at	AT2G41760
GRMZM2G023786	262307_at	AT1G71000
GRMZM2G023798	266495_at	AT2G07050
GRMZM2G023833	250553_at	AT5G07960
GRMZM2G023840	247091_at	AT5G66390
GRMZM2G023858	255560_at	AT4G02030
GRMZM2G023884	249513_at	AT5G38460
GRMZM2G023906	259292_at	AT3G11560
GRMZM2G023946	248776_at	AT5G47900
GRMZM2G023970	258627_at	AT3G04460
GRMZM2G023983	260021_at	AT1G30010
GRMZM2G023999	252332_at	AT3G48810
GRMZM2G024024	255844_at	AT2G33580
GRMZM2G024051	247609_at	AT5G60940
GRMZM2G024073	253990_at	AT4G26160
GRMZM2G024099	264672_at	AT1G09750
GRMZM2G024109	251878_at	AT3G54310
GRMZM2G024119	250482_at	AT5G10320
GRMZM2G024145	256387_at	AT3G06170
GRMZM2G024175	262072_at	AT1G59590
GRMZM2G024180	254151_at	AT4G24390
GRMZM2G024211	245940_at	AT5G19630
GRMZM2G024231	260339_at	AT1G69220
GRMZM2G024247	266999_at	AT2G34450
GRMZM2G024260	258136_at	AT3G24560
GRMZM2G024267	245326_at	AT4G14100
GRMZM2G024293	254375_at	AT4G21800
GRMZM2G024310	263874_at	AT2G21870
GRMZM2G024331	248358_at	AT5G52400
GRMZM2G024389	259594_at	AT1G28140
GRMZM2G024435	246052_at	AT5G08310
GRMZM2G024451	257803_at	AT3G18790
GRMZM2G024476	261109_at	AT1G75450
GRMZM2G024482	263432_at	AT2G22230
GRMZM2G024484	250534_at	AT5G08530
GRMZM2G024499	260858_at	AT1G43770
GRMZM2G024533	252546_at	AT3G45830
GRMZM2G024550	245565_at	AT4G14605
GRMZM2G024563	248459_at	AT5G51020
GRMZM2G024576	252548_at	AT3G45850
GRMZM2G024612	253532_at	AT4G31570
GRMZM2G024657	251149_at	AT3G62940
GRMZM2G024686	250291_at	AT5G13280
GRMZM2G024718	265675_at	AT2G32120
GRMZM2G024730	251267_at	AT3G62330
GRMZM2G024733	257357_at	AT2G41050
GRMZM2G024738	257219_at	AT3G14930
GRMZM2G024775	246240_at	AT4G37130
GRMZM2G024811	254076_at	AT4G25340
GRMZM2G024823	248838_at	AT5G46800
GRMZM2G024858	250263_at	AT5G13470
GRMZM2G024882	252443_at	AT3G46960
GRMZM2G024976	261171_at	AT1G04880
GRMZM2G024992	250065_at	AT5G17910
GRMZM2G025014	249164_at	AT5G42820
GRMZM2G025024	267071_at	AT2G40980
GRMZM2G025026	265334_at	AT2G18370
GRMZM2G025042	264443_at	AT1G27385
GRMZM2G025074	264362_at	AT1G03290
GRMZM2G025078	267405_at	AT2G33740
GRMZM2G025123	262202_at	AT2G01110
GRMZM2G025126	256323_at	AT1G54920
GRMZM2G025127	263419_at	AT2G17220
GRMZM2G025157	256107_at	AT1G16830
GRMZM2G025164	246708_at	AT5G28150
GRMZM2G025171	255046_at	AT4G09650
GRMZM2G025182	255523_at	AT4G02320
GRMZM2G025215	250193_at	AT5G14540
GRMZM2G025236	247207_at	AT5G65000
GRMZM2G025248	259349_at	AT3G03860
GRMZM2G025294	245909_at	AT5G09380
GRMZM2G025322	259965_at	AT1G53670
GRMZM2G025340	247528_at	AT5G61460
GRMZM2G025356	264924_at	AT1G60620
GRMZM2G025387	254224_at	AT4G23650
GRMZM2G025409	252904_at	AT4G39620
GRMZM2G025429	260240_at	AT1G68460
GRMZM2G025451	247363_at	AT5G63200
GRMZM2G025480	254913_at	AT4G11270
GRMZM2G025488	257849_at	AT3G13060
GRMZM2G025528	265713_at	AT2G03530
GRMZM2G025531	259296_at	AT3G05350
GRMZM2G025579	246016_at	AT5G10720
GRMZM2G025592	260417_at	AT1G69770
GRMZM2G025598	258575_at	AT3G04240
GRMZM2G025611	251906_at	AT3G53720
GRMZM2G025642	265813_at	AT2G18060
GRMZM2G025659	254783_at	AT4G12830
GRMZM2G025731	266614_at	AT2G14910
GRMZM2G025742	250123_at	AT5G16530
GRMZM2G025806	257705_at	AT3G12760
GRMZM2G025812	259626_at	AT1G42990
GRMZM2G025832	250558_at	AT5G07990
GRMZM2G025854	248380_at	AT5G51820
GRMZM2G025855	267435_at	AT2G33800
GRMZM2G025867	255883_at	AT1G20270
GRMZM2G025870	256818_at	AT3G21420
GRMZM2G025882	264185_at	AT1G54780
GRMZM2G025906	248787_at	AT5G47420
GRMZM2G025924	255796_at	AT2G33290
GRMZM2G025954	250133_at	AT5G16400
GRMZM2G025977	246985_at	AT5G67290
GRMZM2G026015	254790_at	AT4G12800
GRMZM2G026020	262821_at	AT1G11800
GRMZM2G026043	267599_at	AT2G32850
GRMZM2G026085	263251_at	AT2G31410
GRMZM2G026095	252316_at	AT3G48700
GRMZM2G026180	265721_at	AT2G40090
GRMZM2G026188	247448_at	AT5G62770
GRMZM2G026218	248773_at	AT5G47820
GRMZM2G026231	260482_at	AT1G10950
GRMZM2G026301	251500_at	AT3G59110
GRMZM2G026309	253923_at	AT4G27060
GRMZM2G026311	253944_at	AT4G27040
GRMZM2G026346	249129_at	AT5G43080
GRMZM2G026442	265535_at	AT2G15900
GRMZM2G026470	266765_at	AT2G46860
GRMZM2G026490	256573_at	AT3G14860
GRMZM2G026560	247603_at	AT5G60930
GRMZM2G026580	254118_at	AT4G24790
GRMZM2G026614	256678_at	AT3G52380
GRMZM2G026639	248785_at	AT5G47400
GRMZM2G026643	255636_at	AT4G00730
GRMZM2G026649	251903_at	AT3G54120
GRMZM2G026744	246860_at	AT5G25840
GRMZM2G026746	261345_at	AT1G79760
GRMZM2G026758	248484_at	AT5G51030
GRMZM2G026800	266767_at	AT2G46910
GRMZM2G026807	247523_at	AT5G61410
GRMZM2G026855	264637_at	AT1G65560
GRMZM2G026868	257755_at	AT3G18760
GRMZM2G026869	250137_at	AT5G15390
GRMZM2G026881	252211_at	AT3G50220
GRMZM2G026911	267592_at	AT2G39710
GRMZM2G026983	266874_at	AT2G44760
GRMZM2G026991	262800_at	AT1G20960
GRMZM2G027007	248280_at	AT5G52950
GRMZM2G027021	247891_at	AT5G57960
GRMZM2G027023	250347_at	AT5G11960
GRMZM2G027049	258400_at	AT3G15470
GRMZM2G027052	245416_at	AT4G17350
GRMZM2G027059	253235_at	AT4G34350
GRMZM2G027115	254417_at	AT4G21470
GRMZM2G027120	248014_at	AT5G56340
GRMZM2G027131	260671_at	AT1G19310
GRMZM2G027166	254874_at	AT4G11570
GRMZM2G027193	261379_at	AT1G18720
GRMZM2G027198	266356_at	AT2G32300
GRMZM2G027209	261671_at	AT1G18340
GRMZM2G027219	264799_at	AT1G08550
GRMZM2G027232	253138_at	AT4G35490
GRMZM2G027307	251386_at	AT3G60800
GRMZM2G027309	255739_at	AT1G25580
GRMZM2G027311	258154_at	AT3G18210
GRMZM2G027331	248986_at	AT5G45170
GRMZM2G027378	263949_at	AT2G36060
GRMZM2G027392	252348_at	AT3G48140
GRMZM2G027420	254367_at	AT4G21700
GRMZM2G027437	266406_at	AT2G38570
GRMZM2G027462	265254_at	AT2G28380
GRMZM2G027478	251727_at	AT3G56290
GRMZM2G027603	265669_at	AT2G32040
GRMZM2G027640	245354_at	AT4G17600
GRMZM2G027663	266673_at	AT2G29630
GRMZM2G027697	254714_at	AT4G13480
GRMZM2G027726	248833_at	AT5G47120
GRMZM2G027737	257875_at	AT3G17120
GRMZM2G027741	246421_at	AT5G16880
GRMZM2G027756	257078_at	AT3G15220
GRMZM2G027821	253109_at	AT4G35920
GRMZM2G027835	251392_at	AT3G60880
GRMZM2G027851	259081_at	AT3G05030
GRMZM2G027867	267118_at	AT2G32590
GRMZM2G027886	261865_at	AT1G50430
GRMZM2G027932	264492_at	AT1G27430
GRMZM2G027958	263478_at	AT2G31880
GRMZM2G027991	257487_at	AT1G71850
GRMZM2G027995	262956_at	AT1G54270
GRMZM2G028004	266449_at	AT2G43080
GRMZM2G028007	263038_at	AT1G23270
GRMZM2G028036	260509_at	AT1G47240
GRMZM2G028096	246436_at	AT5G17440
GRMZM2G028132	251593_at	AT3G57660
GRMZM2G028136	265657_at	AT2G13840
GRMZM2G028139	254904_at	AT4G11160
GRMZM2G028151	253010_at	AT4G37750
GRMZM2G028188	250730_at	AT5G06490
GRMZM2G028190	262063_at	AT1G80000
GRMZM2G028216	247201_at	AT5G65220
GRMZM2G028234	265853_at	AT2G42360
GRMZM2G028266	255536_at	AT4G01575
GRMZM2G028286	255175_at	AT4G07960
GRMZM2G028302	266716_at	AT2G46820
GRMZM2G028307	256866_at	AT3G26380
GRMZM2G028313	256119_at	AT1G18070
GRMZM2G028369	260360_at	AT1G69370
GRMZM2G028379	250515_at	AT5G09570
GRMZM2G028467	249551_at	AT5G38220
GRMZM2G028501	253037_at	AT4G38270
GRMZM2G028516	261692_at	AT1G08450
GRMZM2G028521	264170_at	AT1G02260
GRMZM2G028552	267210_at	AT2G30920
GRMZM2G028568	261718_at	AT1G18390
GRMZM2G028643	257028_at	AT3G19230
GRMZM2G028648	259483_at	AT1G43980
GRMZM2G028730	248041_at	AT5G55940
GRMZM2G028758	254169_at	AT4G24290
GRMZM2G028763	257860_at	AT3G13062
GRMZM2G028766	261153_at	AT1G04850
GRMZM2G028813	256822_at	AT3G22190
GRMZM2G028889	247149_at	AT5G65660
GRMZM2G028900	245227_s_at	AT1G08410
GRMZM2G028902	250150_at	AT5G14710
GRMZM2G028914	250442_at	AT5G10490
GRMZM2G028926	246955_at	AT5G04870
GRMZM2G028928	249430_at	AT5G39900
GRMZM2G028929	263223_at	AT1G30630
GRMZM2G028980	256311_at	AT1G30330
GRMZM2G029001	252371_at	AT3G48070
GRMZM2G029055	251807_at	AT3G55400
GRMZM2G029077	250352_at	AT5G11490
GRMZM2G029082	259322_at	AT3G05270
GRMZM2G029113	246088_at	AT5G20600
GRMZM2G029153	255561_at	AT4G02050
GRMZM2G029184	260442_at	AT1G68220
GRMZM2G029194	260307_at	AT1G70620
GRMZM2G029223	259144_at	AT3G10180
GRMZM2G029242	246327_at	AT1G16670
GRMZM2G029262	264095_at	AT1G79230
GRMZM2G029323	262135_at	AT1G78080
GRMZM2G029478	246160_at	AT5G21040
GRMZM2G029506	259380_at	AT3G16340
GRMZM2G029514	253979_at	AT4G26680
GRMZM2G029519	259537_at	AT1G12370
GRMZM2G029530	251494_at	AT3G59350
GRMZM2G029536	260349_at	AT1G69400
GRMZM2G029543	267308_at	AT2G30200
GRMZM2G029546	263985_at	AT2G42750
GRMZM2G029547	250149_at	AT5G14700
GRMZM2G029552	265154_at	AT1G30960
GRMZM2G029583	254086_at	AT4G24820
GRMZM2G029731	252934_at	AT4G39120
GRMZM2G029756	260833_at	AT1G06800
GRMZM2G029824	261534_at	AT1G01820
GRMZM2G029845	263180_at	AT1G05620
GRMZM2G029856	255901_at	AT1G17890
GRMZM2G029912	247884_at	AT5G57800
GRMZM2G029933	255465_at	AT4G02990
GRMZM2G030016	256143_at	AT1G48830
GRMZM2G030072	264641_at	AT1G09130
GRMZM2G030097	252540_at	AT3G45740
GRMZM2G030116	256062_at	AT1G07090
GRMZM2G030125	259754_at	AT1G71090
GRMZM2G030128	265678_at	AT2G31970
GRMZM2G030165	250194_at	AT5G14550
GRMZM2G030167	254903_at	AT4G11150
GRMZM2G030223	251839_at	AT3G54950
GRMZM2G030235	250237_at	AT5G13560
GRMZM2G030240	247486_at	AT5G62140
GRMZM2G030241	246462_at	AT5G16940
GRMZM2G030265	258639_at	AT3G07820
GRMZM2G030275	264086_at	AT2G31190
GRMZM2G030299	251353_at	AT3G61080
GRMZM2G030384	258146_at	AT3G18060
GRMZM2G030463	259202_at	AT3G09100
GRMZM2G030523	266297_at	AT2G29570
GRMZM2G030529	245490_at	AT4G16310
GRMZM2G030542	248693_at	AT5G48330
GRMZM2G030596	259469_at	AT1G19100
GRMZM2G030598	260519_at	AT1G51540
GRMZM2G030606	245198_at	AT1G67700
GRMZM2G030628	246651_at	AT5G35170
GRMZM2G030636	261949_at	AT1G64670
GRMZM2G030673	246301_at	AT3G51850
GRMZM2G030710	267452_at	AT2G33860
GRMZM2G030712	267622_at	AT2G39690
GRMZM2G030717	265672_at	AT2G31980
GRMZM2G030768	249098_at	AT5G43530
GRMZM2G030784	251801_at	AT3G55440
GRMZM2G030809	264023_at	AT2G21195
GRMZM2G030873	245518_at	AT4G15850
GRMZM2G030877	261815_at	AT1G08320
GRMZM2G030880	251941_at	AT3G53470
GRMZM2G031022	261324_at	AT1G44770
GRMZM2G031033	258939_at	AT3G10020
GRMZM2G031057	259207_at	AT3G09050
GRMZM2G031107	249372_at	AT5G40760
GRMZM2G031169	267005_at	AT2G34460
GRMZM2G031177	247193_at	AT5G65380
GRMZM2G031213	259212_at	AT3G09180
GRMZM2G031239	247580_at	AT5G61330
GRMZM2G031308	254227_at	AT4G23630
GRMZM2G031317	252624_at	AT3G44735
GRMZM2G031323	254413_at	AT4G21440
GRMZM2G031326	263415_at	AT2G17250
GRMZM2G031447	246485_at	AT5G16080
GRMZM2G031496	248462_at	AT5G50960
GRMZM2G031523	247818_at	AT5G58370
GRMZM2G031529	254527_at	AT4G19610
GRMZM2G031588	265708_at	AT2G03380
GRMZM2G031613	247697_at	AT5G59810
GRMZM2G031656	265629_at	AT2G27230
GRMZM2G031660	264280_at	AT1G61820
GRMZM2G031718	257765_at	AT3G23020
GRMZM2G031721	254727_at	AT4G13670
GRMZM2G031761	257003_at	AT3G14110
GRMZM2G031780	250824_at	AT5G05200
GRMZM2G031802	257104_at	AT3G25040
GRMZM2G031824	264701_at	AT1G70160
GRMZM2G031825	258775_at	AT3G10850
GRMZM2G031859	263077_at	AT2G17510
GRMZM2G031930	264003_at	AT2G22475
GRMZM2G031941	254430_at	AT4G20820
GRMZM2G031952	266880_at	AT2G44770
GRMZM2G031963	248008_at	AT5G56270
GRMZM2G031983	254016_at	AT4G26150
GRMZM2G031993	245641_at	AT1G25370
GRMZM2G032022	245733_at	AT1G73380
GRMZM2G032047	249652_at	AT5G37070
GRMZM2G032049	245631_at	AT1G25350
GRMZM2G032104	245404_at	AT4G17610
GRMZM2G032132	250284_at	AT5G13290
GRMZM2G032160	246532_at	AT5G15870
GRMZM2G032163	261354_at	AT1G79690
GRMZM2G032182	256055_at	AT1G07030
GRMZM2G032219	266992_at	AT2G39200
GRMZM2G032222	260536_at	AT2G43400
GRMZM2G032252	256590_at	AT3G28730
GRMZM2G032253	258055_at	AT3G16250
GRMZM2G032258	265310_at	AT2G20280
GRMZM2G032260	247106_at	AT5G66240
GRMZM2G032266	262693_at	AT1G62780
GRMZM2G032267	249938_at	AT5G22330
GRMZM2G032280	265887_at	AT2G25710
GRMZM2G032282	264820_at	AT1G03475
GRMZM2G032314	249842_at	AT5G23550
GRMZM2G032315	249738_at	AT5G24510
GRMZM2G032336	257883_at	AT3G16940
GRMZM2G032337	264479_at	AT1G77280
GRMZM2G032350	263535_at	AT2G24970
GRMZM2G032351	247853_at	AT5G58140
GRMZM2G032367	249324_at	AT5G40810
GRMZM2G032376	262682_at	AT1G75900
GRMZM2G032409	259883_at	AT1G76400
GRMZM2G032475	252113_at	AT3G51620
GRMZM2G032505	259114_at	AT3G05530
GRMZM2G032564	263691_at	AT1G26880
GRMZM2G032619	247819_at	AT5G58350
GRMZM2G032648	253864_at	AT4G27460
GRMZM2G032684	245418_at	AT4G17370
GRMZM2G032694	245294_at	AT4G14340
GRMZM2G032699	247621_at	AT5G60340
GRMZM2G032706	258827_at	AT3G07150
GRMZM2G032821	261376_at	AT1G18660
GRMZM2G032936	247806_at	AT5G58270
GRMZM2G032944	264243_at	AT1G54650
GRMZM2G033022	246328_at	AT3G43590
GRMZM2G033029	246469_at	AT5G17070
GRMZM2G033098	249208_at	AT5G42650
GRMZM2G033117	257790_at	AT3G27090
GRMZM2G033126	246236_at	AT4G36470
GRMZM2G033138	253648_at	AT4G29940
GRMZM2G033175	249586_at	AT5G37840
GRMZM2G033198	246226_at	AT4G37200
GRMZM2G033199	264674_at	AT1G09815
GRMZM2G033208	251396_at	AT3G60750
GRMZM2G033219	267188_at	AT2G44050
GRMZM2G033267	247048_at	AT5G66560
GRMZM2G033283	250343_at	AT5G11900
GRMZM2G033348	245926_at	AT5G24740
GRMZM2G033356	258310_at	AT3G26744
GRMZM2G033413	263907_at	AT2G36270
GRMZM2G033478	245415_at	AT4G17330
GRMZM2G033491	245484_at	AT4G16210
GRMZM2G033493	265415_at	AT2G20890
GRMZM2G033521	259884_at	AT1G76390
GRMZM2G033570	257981_at	AT3G20770
GRMZM2G033592	250245_at	AT5G13690
GRMZM2G033619	245941_at	AT5G19820
GRMZM2G033630	258633_at	AT3G07990
GRMZM2G033634	267533_at	AT2G42070
GRMZM2G033644	258527_at	AT3G06850
GRMZM2G033653	257891_at	AT3G17170
GRMZM2G033671	254517_at	AT4G20310
GRMZM2G033694	267184_at	AT2G44150
GRMZM2G033785	262081_at	AT1G59540
GRMZM2G033828	256268_at	AT3G12280
GRMZM2G033846	248607_at	AT5G49480
GRMZM2G033867	250372_at	AT5G11460
GRMZM2G033884	249965_at	AT5G19020
GRMZM2G033885	258993_at	AT3G08940
GRMZM2G033894	261583_at	AT1G01090
GRMZM2G033915	267532_at	AT2G42040
GRMZM2G033926	253624_at	AT4G30580
GRMZM2G033930	259162_at	AT3G01640
GRMZM2G033971	251285_at	AT3G61770
GRMZM2G034005	258568_at	AT3G04470
GRMZM2G034013	263759_at	AT2G21290
GRMZM2G034025	249758_at	AT5G24350
GRMZM2G034065	255936_at	AT1G12680
GRMZM2G034069	255787_at	AT2G33590
GRMZM2G034083	264504_at	AT1G09430
GRMZM2G034096	267370_at	AT2G44525
GRMZM2G034110	248795_at	AT5G47390
GRMZM2G034122	259097_at	AT3G04830
GRMZM2G034143	264561_at	AT1G55810
GRMZM2G034152	250246_at	AT5G13700
GRMZM2G034157	250296_at	AT5G12020
GRMZM2G034225	248219_at	AT5G53650
GRMZM2G034243	262878_at	AT1G64770
GRMZM2G034260	261272_at	AT1G26665
GRMZM2G034313	248452_at	AT5G51300
GRMZM2G034360	249289_at	AT5G41040
GRMZM2G034372	262337_at	AT1G64260
GRMZM2G034410	247545_at	AT5G61530
GRMZM2G034417	258613_at	AT3G02870
GRMZM2G034430	250359_at	AT5G11350
GRMZM2G034503	261867_at	AT1G50575
GRMZM2G034511	250922_at	AT5G03345
GRMZM2G034551	267304_at	AT2G30080
GRMZM2G034563	249206_at	AT5G42630
GRMZM2G034598	251782_at	AT3G55260
GRMZM2G034638	257788_at	AT3G27010
GRMZM2G034639	262487_at	AT1G21610
GRMZM2G034697	261902_at	AT1G80860
GRMZM2G034828	257115_at	AT3G20150
GRMZM2G034840	255782_at	AT1G19850
GRMZM2G034855	245657_at	AT1G56720
GRMZM2G034882	257660_at	AT3G13360
GRMZM2G034943	250328_at	AT5G11780
GRMZM2G034956	259632_at	AT1G56430
GRMZM2G034975	247417_at	AT5G63040
GRMZM2G035042	251669_at	AT3G57180
GRMZM2G035103	257022_at	AT3G19580
GRMZM2G035131	250335_at	AT5G11650
GRMZM2G035134	253673_at	AT4G29530
GRMZM2G035150	245699_at	AT5G04250
GRMZM2G035168	262036_at	AT1G35530
GRMZM2G035170	248393_at	AT5G52060
GRMZM2G035202	247689_at	AT5G59770
GRMZM2G035213	262875_at	AT1G64970
GRMZM2G035222	262986_at	AT1G23390
GRMZM2G035268	265998_at	AT2G24270
GRMZM2G035338	263167_at	AT1G03030
GRMZM2G035356	250311_at	AT5G12240
GRMZM2G035421	250877_at	AT5G04040
GRMZM2G035461	264113_at	AT2G31260
GRMZM2G035477	260670_at	AT1G19520
GRMZM2G035503	262181_at	AT1G78060
GRMZM2G035520	247439_at	AT5G62670
GRMZM2G035557	267366_at	AT2G44310
GRMZM2G035574	261302_at	AT1G48580
GRMZM2G035594	260935_at	AT1G45110
GRMZM2G035595	245853_at	AT5G13500
GRMZM2G035620	267059_at	AT2G32520
GRMZM2G035664	247550_at	AT5G61370
GRMZM2G035665	264114_at	AT2G31270
GRMZM2G035708	252853_at	AT4G39710
GRMZM2G035709	246348_at	AT3G56840
GRMZM2G035749	245346_at	AT4G17090
GRMZM2G035785	252398_at	AT3G47990
GRMZM2G035790	259839_at	AT1G52190
GRMZM2G035809	260774_at	AT1G78290
GRMZM2G035820	253095_at	AT4G37510
GRMZM2G035843	262026_at	AT1G35670
GRMZM2G035922	251799_at	AT3G55520
GRMZM2G035928	264178_at	AT1G02170
GRMZM2G035985	251179_at	AT3G63460
GRMZM2G035994	253692_at	AT4G29720
GRMZM2G035996	264972_at	AT1G67370
GRMZM2G035997	255586_at	AT4G01560
GRMZM2G036007	255249_at	AT4G05090
GRMZM2G036019	260316_at	AT1G63810
GRMZM2G036034	253231_at	AT4G34450
GRMZM2G036050	249816_at	AT5G23880
GRMZM2G036086	261739_at	AT1G47750
GRMZM2G036099	246291_at	AT3G56820
GRMZM2G036134	251899_at	AT3G54400
GRMZM2G036282	263737_at	AT1G60010
GRMZM2G036340	261768_at	AT1G15550
GRMZM2G036418	252431_at	AT3G47700
GRMZM2G036427	266458_at	AT2G47710
GRMZM2G036448	251722_at	AT3G56200
GRMZM2G036455	248197_at	AT5G54190
GRMZM2G036464	249581_at	AT5G37600
GRMZM2G036502	258389_at	AT3G15390
GRMZM2G036609	245701_at	AT5G04140
GRMZM2G036697	258714_at	AT3G09770
GRMZM2G036708	251322_at	AT3G61440
GRMZM2G036826	252949_at	AT4G38670
GRMZM2G036829	258039_at	AT3G21200
GRMZM2G036837	266506_at	AT2G47850
GRMZM2G036916	264247_at	AT1G60160
GRMZM2G036921	251993_at	AT3G52960
GRMZM2G036940	246067_at	AT5G19410
GRMZM2G036991	247673_at	AT5G60230
GRMZM2G037012	258530_at	AT3G06840
GRMZM2G037015	250350_at	AT5G12010
GRMZM2G037043	262046_at	AT1G79960
GRMZM2G037064	264615_at	AT1G04590
GRMZM2G037140	247656_at	AT5G59890
GRMZM2G037146	266309_at	AT2G27140
GRMZM2G037150	260589_at	AT1G53400
GRMZM2G037152	258911_at	AT3G06470
GRMZM2G037164	250338_at	AT5G11760
GRMZM2G037185	263756_at	AT2G21270
GRMZM2G037265	264532_at	AT1G55740
GRMZM2G037284	252981_at	AT4G38260
GRMZM2G037322	265341_at	AT2G18360
GRMZM2G037335	249089_at	AT5G44240
GRMZM2G037343	263720_at	AT2G13620
GRMZM2G037386	267613_at	AT2G26700
GRMZM2G037411	248066_at	AT5G55590
GRMZM2G037431	264931_at	AT1G60590
GRMZM2G037444	248067_at	AT5G55600
GRMZM2G037472	246759_at	AT5G27950
GRMZM2G037496	257279_at	AT3G14430
GRMZM2G037585	249995_at	AT5G18610
GRMZM2G037614	265070_at	AT1G55510
GRMZM2G037624	245268_at	AT4G16570
GRMZM2G037683	260063_at	AT1G73720
GRMZM2G037694	255603_at	AT4G01040
GRMZM2G037698	255830_at	AT2G33340
GRMZM2G037778	253758_at	AT4G29060
GRMZM2G038013	260165_at	AT1G79850
GRMZM2G038019	261323_at	AT1G44760
GRMZM2G038032	256072_at	AT1G18080
GRMZM2G038050	257265_at	AT3G14980
GRMZM2G038126	247810_at	AT5G58290
GRMZM2G038152	255769_at	AT1G18610
GRMZM2G038243	250968_at	AT5G02890
GRMZM2G038281	247348_at	AT5G63810
GRMZM2G038301	262397_at	AT1G49380
GRMZM2G038338	256607_at	AT3G32930
GRMZM2G038356	255505_at	AT4G02080
GRMZM2G038374	250370_at	AT5G11430
GRMZM2G038375	267638_at	AT2G42210
GRMZM2G038384	263328_at	AT2G15280
GRMZM2G038388	257277_at	AT3G14470
GRMZM2G038394	245732_at	AT1G73440
GRMZM2G038401	261064_at	AT1G07510
GRMZM2G038487	245242_at	AT1G44446
GRMZM2G038494	262086_at	AT1G56050
GRMZM2G038512	254781_at	AT4G12840
GRMZM2G038532	249064_at	AT5G44250
GRMZM2G038536	249937_at	AT5G22470
GRMZM2G038588	258842_at	AT3G04680
GRMZM2G038598	254188_at	AT4G23920
GRMZM2G038606	246741_at	AT5G27720
GRMZM2G038636	252622_at	AT3G45310
GRMZM2G038669	250909_at	AT5G03700
GRMZM2G038780	264842_at	AT1G03700
GRMZM2G038791	267365_at	AT2G44530
GRMZM2G038839	265489_at	AT2G15640
GRMZM2G038848	266704_at	AT2G19940
GRMZM2G038931	253525_at	AT4G31330
GRMZM2G038964	267318_at	AT2G34770
GRMZM2G039011	260227_at	AT1G74450
GRMZM2G039089	250713_at	AT5G06130
GRMZM2G039094	249100_at	AT5G43560
GRMZM2G039106	247918_at	AT5G57610
GRMZM2G039155	262142_at	AT1G52640
GRMZM2G039173	255862_at	AT2G30300
GRMZM2G039186	259318_at	AT3G01100
GRMZM2G039214	259181_at	AT3G01690
GRMZM2G039246	259329_at	AT3G16360
GRMZM2G039254	259899_at	AT1G71210
GRMZM2G039263	257125_at	AT3G20050
GRMZM2G039325	245645_at	AT1G24764
GRMZM2G039396	255537_at	AT4G01690
GRMZM2G039419	259995_at	AT1G67930
GRMZM2G039454	253428_at	AT4G32410
GRMZM2G039455	262246_at	AT1G48410
GRMZM2G039505	264518_at	AT1G09980
GRMZM2G039525	264696_at	AT1G70230
GRMZM2G039536	249355_at	AT5G40500
GRMZM2G039592	252125_at	AT3G51040
GRMZM2G039650	251134_at	AT5G01270
GRMZM2G039671	251833_at	AT3G55160
GRMZM2G039711	250532_at	AT5G08540
GRMZM2G039757	255543_at	AT4G01870
GRMZM2G039792	257006_at	AT3G14075
GRMZM2G039826	262331_at	AT1G64050
GRMZM2G039889	257695_at	AT3G12680
GRMZM2G039895	257420_at	AT1G77250
GRMZM2G039900	247597_at	AT5G60860
GRMZM2G039930	258128_at	AT3G24590
GRMZM2G039934	247527_at	AT5G61480
GRMZM2G039978	252186_at	AT3G50810
GRMZM2G039982	246005_at	AT5G08415
GRMZM2G039996	259491_at	AT1G15820
GRMZM2G040030	252135_at	AT3G50830
GRMZM2G040050	245041_at	AT2G26530
GRMZM2G040052	264206_at	AT1G22730
GRMZM2G040079	261257_at	AT1G05910
GRMZM2G040090	259524_at	AT1G12550
GRMZM2G040102	252946_at	AT4G39235
GRMZM2G040115	257964_at	AT3G19850
GRMZM2G040145	262532_at	AT1G17210
GRMZM2G040158	248375_at	AT5G51710
GRMZM2G040161	259999_at	AT1G68080
GRMZM2G040182	253369_at	AT4G33210
GRMZM2G040207	257826_at	AT3G26730
GRMZM2G040247	261783_at	AT1G08190
GRMZM2G040300	252876_at	AT4G39970
GRMZM2G040309	250306_at	AT5G12170
GRMZM2G040359	249277_at	AT5G41890
GRMZM2G040382	246171_at	AT5G32440
GRMZM2G040389	253516_at	AT4G31360
GRMZM2G040401	251528_at	AT3G58600
GRMZM2G040467	266660_at	AT2G25920
GRMZM2G040511	247232_at	AT5G64940
GRMZM2G040559	261635_at	AT1G50020
GRMZM2G040561	258220_at	AT3G17830
GRMZM2G040587	265826_at	AT2G35795
GRMZM2G040613	252426_at	AT3G47630
GRMZM2G040627	256798_at	AT3G18630
GRMZM2G040634	251490_at	AT3G59490
GRMZM2G040664	265418_at	AT2G20880
GRMZM2G040672	250453_at	AT5G10620
GRMZM2G040702	245569_at	AT4G14660
GRMZM2G040720	261969_at	AT1G65950
GRMZM2G040762	261584_at	AT1G01040
GRMZM2G040828	248783_at	AT5G47360
GRMZM2G040843	249898_at	AT5G22510
GRMZM2G040876	256029_at	AT1G34130
GRMZM2G040878	246154_at	AT5G19940
GRMZM2G040887	263068_at	AT2G17580
GRMZM2G040902	256182_at	AT1G51740
GRMZM2G040933	247289_at	AT5G64290
GRMZM2G040945	266574_at	AT2G23890
GRMZM2G040947	260217_at	AT1G74600
GRMZM2G040968	246829_at	AT5G26570
GRMZM2G040991	245426_at	AT4G17540
GRMZM2G040995	262906_at	AT1G59760
GRMZM2G041015	266591_at	AT2G46225
GRMZM2G041028	258847_at	AT3G03100
GRMZM2G041050	245046_at	AT2G26510
GRMZM2G041060	254545_at	AT4G19830
GRMZM2G041068	266017_at	AT2G18690
GRMZM2G041125	245458_at	AT4G16970
GRMZM2G041141	261597_at	AT1G49780
GRMZM2G041159	246033_at	AT5G08280
GRMZM2G041175	267293_at	AT2G23810
GRMZM2G041238	252235_at	AT3G49910
GRMZM2G041328	258549_at	AT3G06930
GRMZM2G041352	260438_at	AT1G68290
GRMZM2G041394	248131_at	AT5G54830
GRMZM2G041454	246768_at	AT5G27400
GRMZM2G041462	266327_at	AT2G46680
GRMZM2G041472	262544_at	AT1G15420
GRMZM2G041518	263218_at	AT1G30570
GRMZM2G041527	260574_at	AT2G47300
GRMZM2G041561	266836_at	AT2G26000
GRMZM2G041613	262078_at	AT1G59520
GRMZM2G041645	253856_at	AT4G28100
GRMZM2G041697	260084_at	AT1G63210
GRMZM2G041701	245685_at	AT5G22220
GRMZM2G041732	247335_at	AT5G63630
GRMZM2G041765	247480_at	AT5G62390
GRMZM2G041797	256000_at	AT1G29880
GRMZM2G041822	262343_at	AT1G64040
GRMZM2G041831	248485_at	AT5G51050
GRMZM2G041847	248694_at	AT5G48340
GRMZM2G041878	249345_at	AT5G40740
GRMZM2G041885	253341_at	AT4G33410
GRMZM2G041955	266002_at	AT2G37310
GRMZM2G041959	261525_at	AT1G14330
GRMZM2G041994	250072_at	AT5G17210
GRMZM2G042008	261055_at	AT1G01300
GRMZM2G042027	252878_at	AT4G39460
GRMZM2G042032	250970_at	AT5G02770
GRMZM2G042036	255865_at	AT2G30330
GRMZM2G042040	262932_at	AT1G65820
GRMZM2G042061	255850_at	AT2G33450
GRMZM2G042080	248493_at	AT5G51100
GRMZM2G042089	250816_at	AT5G05010
GRMZM2G042099	251506_at	AT3G59090
GRMZM2G042118	254684_at	AT4G13850
GRMZM2G042136	246201_at	AT4G36750
GRMZM2G042143	255434_at	AT4G03180
GRMZM2G042164	259199_at	AT3G08980
GRMZM2G042171	250475_at	AT5G10180
GRMZM2G042208	246204_at	AT4G37020
GRMZM2G042218	260925_at	AT1G21340
GRMZM2G042231	261701_at	AT1G32750
GRMZM2G042245	249425_at	AT5G39790
GRMZM2G042313	245868_at	AT1G58030
GRMZM2G042356	252064_at	AT3G51520
GRMZM2G042364	250659_at	AT5G07050
GRMZM2G042371	262395_at	AT1G49540
GRMZM2G042398	256696_at	AT3G20650
GRMZM2G042421	266581_at	AT2G46140
GRMZM2G042443	254933_at	AT4G11130
GRMZM2G042492	260898_at	AT1G29070
GRMZM2G042494	256300_at	AT1G69490
GRMZM2G042502	259969_at	AT1G76550
GRMZM2G042516	260106_at	AT1G35420
GRMZM2G042539	250975_at	AT5G03050
GRMZM2G042593	246796_at	AT5G26770
GRMZM2G042599	261592_at	AT1G01760
GRMZM2G042615	264257_at	AT1G09230
GRMZM2G042660	246603_at	AT1G31690
GRMZM2G042733	255056_at	AT4G09820
GRMZM2G042754	248476_at	AT5G50890
GRMZM2G042756	254075_at	AT4G25470
GRMZM2G042797	250784_at	AT5G05480
GRMZM2G042807	266055_at	AT2G40650
GRMZM2G042855	245763_at	AT1G27850
GRMZM2G042881	258194_at	AT3G29170
GRMZM2G042889	257025_at	AT3G19190
GRMZM2G042895	247945_at	AT5G57150
GRMZM2G042981	246404_at	AT1G57600
GRMZM2G043119	245104_at	AT2G41600
GRMZM2G043127	262402_at	AT1G49410
GRMZM2G043174	245562_at	AT4G15520
GRMZM2G043198	248474_at	AT5G50850
GRMZM2G043212	263131_at	AT1G78630
GRMZM2G043226	245564_at	AT4G14590
GRMZM2G043238	259078_at	AT3G05040
GRMZM2G043279	258709_at	AT3G09500
GRMZM2G043331	258478_at	AT3G02710
GRMZM2G043383	265010_at	AT1G24510
GRMZM2G043414	248450_at	AT5G51290
GRMZM2G043453	261695_at	AT1G08520
GRMZM2G043464	249160_at	AT5G42660
GRMZM2G043484	255510_at	AT4G02020
GRMZM2G043500	248409_at	AT5G51545
GRMZM2G043501	255327_at	AT4G04320
GRMZM2G043521	248915_at	AT5G45690
GRMZM2G043530	246261_at	AT1G31810
GRMZM2G043632	245842_at	AT1G58430
GRMZM2G043724	248442_at	AT5G51280
GRMZM2G043737	254049_at	AT4G25740
GRMZM2G043764	253752_at	AT4G28910
GRMZM2G043776	249830_at	AT5G23300
GRMZM2G043782	264807_at	AT1G08700
GRMZM2G043799	255716_at	AT4G00330
GRMZM2G043819	265637_at	AT2G27490
GRMZM2G043854	257642_at	AT3G25710
GRMZM2G043862	247997_at	AT5G56180
GRMZM2G043878	248686_at	AT5G48540
GRMZM2G043887	264777_at	AT1G08630
GRMZM2G043943	245965_at	AT5G19730
GRMZM2G043948	255864_at	AT2G30320
GRMZM2G043995	264776_at	AT1G22860
GRMZM2G044004	252033_at	AT3G51950
GRMZM2G044011	253882_at	AT4G27650
GRMZM2G044023	261014_at	AT1G26460
GRMZM2G044055	257912_at	AT3G25500
GRMZM2G044060	256657_at	AT3G18860
GRMZM2G044074	255826_at	AT2G40490
GRMZM2G044092	249636_at	AT5G36890
GRMZM2G044143	267501_at	AT2G45540
GRMZM2G044174	267443_at	AT2G19000
GRMZM2G044194	252234_at	AT3G49780
GRMZM2G044237	265965_at	AT2G37500
GRMZM2G044247	248402_at	AT5G52100
GRMZM2G044306	253133_at	AT4G35800
GRMZM2G044317	264969_at	AT1G67320
GRMZM2G044337	259598_at	AT1G27980
GRMZM2G044343	260764_at	AT1G48950
GRMZM2G044354	246645_at	AT5G35080
GRMZM2G044368	257754_at	AT3G18820
GRMZM2G044388	255660_at	AT4G00755
GRMZM2G044398	257955_at	AT3G21810
GRMZM2G044460	257154_at	AT3G27210
GRMZM2G044495	266324_at	AT2G46710
GRMZM2G044527	259338_at	AT3G03800
GRMZM2G044531	253359_at	AT4G33080
GRMZM2G044569	260479_at	AT1G11020
GRMZM2G044576	253406_at	AT4G32890
GRMZM2G044584	258995_at	AT3G01790
GRMZM2G044627	263175_at	AT1G05510
GRMZM2G044684	250061_at	AT5G17710
GRMZM2G044697	250739_at	AT5G05740
GRMZM2G044724	253377_at	AT4G33300
GRMZM2G044733	257802_at	AT3G18770
GRMZM2G044744	254659_at	AT4G18240
GRMZM2G044752	245276_at	AT4G16780
GRMZM2G044762	252442_at	AT3G46940
GRMZM2G044775	262746_at	AT1G28960
GRMZM2G044797	254821_at	AT4G12540
GRMZM2G044805	266698_at	AT2G19830
GRMZM2G044819	248628_at	AT5G48960
GRMZM2G044862	250373_at	AT5G11470
GRMZM2G044866	245660_at	AT1G28240
GRMZM2G044968	258040_at	AT3G21190
GRMZM2G044997	257678_at	AT3G20420
GRMZM2G045005	247501_at	AT5G61920
GRMZM2G045090	249585_at	AT5G37830
GRMZM2G045128	246760_at	AT5G27970
GRMZM2G045135	250430_at	AT5G10460
GRMZM2G045154	246313_at	AT1G31920
GRMZM2G045155	245226_at	AT3G29970
GRMZM2G045185	265630_at	AT2G27350
GRMZM2G045236	251702_at	AT3G56660
GRMZM2G045241	254747_at	AT4G13020
GRMZM2G045257	248117_at	AT5G55000
GRMZM2G045270	262481_at	AT1G17080
GRMZM2G045275	266839_at	AT2G25930
GRMZM2G045278	251927_at	AT3G53990
GRMZM2G045280	265627_at	AT2G27285
GRMZM2G045287	258980_at	AT3G08900
GRMZM2G045314	253204_at	AT4G34460
GRMZM2G045331	257984_at	AT3G20800
GRMZM2G045366	251542_at	AT3G58760
GRMZM2G045371	262497_at	AT1G21720
GRMZM2G045435	265366_at	AT2G13290
GRMZM2G045467	266422_at	AT2G38650
GRMZM2G045507	266948_at	AT2G18850
GRMZM2G045596	254494_at	AT4G20050
GRMZM2G045690	250687_at	AT5G06660
GRMZM2G045704	250860_at	AT5G04770
GRMZM2G045714	260393_at	AT1G73920
GRMZM2G045716	252373_at	AT3G48090
GRMZM2G045732	261828_at	AT1G11360
GRMZM2G045748	257140_at	AT3G28910
GRMZM2G045753	259934_at	AT1G71340
GRMZM2G045779	267623_at	AT2G39650
GRMZM2G045808	247039_at	AT5G67270
GRMZM2G045818	246266_at	AT1G31817
GRMZM2G045849	257715_at	AT3G12750
GRMZM2G045854	259245_at	AT3G07660
GRMZM2G045892	245601_at	AT4G14240
GRMZM2G045944	261884_at	AT1G80910
GRMZM2G045971	247632_at	AT5G60460
GRMZM2G045977	263914_at	AT2G36400
GRMZM2G045987	263185_at	AT1G05520
GRMZM2G046021	251849_at	AT3G54610
GRMZM2G046024	260144_at	AT1G71960
GRMZM2G046055	264188_at	AT1G54690
GRMZM2G046058	262224_at	AT1G74900
GRMZM2G046088	259636_at	AT1G56345
GRMZM2G046101	253238_at	AT4G34480
GRMZM2G046186	248377_at	AT5G51720
GRMZM2G046201	263913_at	AT2G36570
GRMZM2G046244	251809_at	AT3G55600
GRMZM2G046274	256485_at	AT1G31440
GRMZM2G046293	247801_at	AT5G58560
GRMZM2G046316	248908_at	AT5G45800
GRMZM2G046348	266576_at	AT2G23940
GRMZM2G046355	247790_at	AT5G58720
GRMZM2G046402	261290_at	AT1G36990
GRMZM2G046407	267602_at	AT2G32970
GRMZM2G046459	265377_at	AT2G05790
GRMZM2G046498	262506_at	AT1G21640
GRMZM2G046503	246946_at	AT5G25070
GRMZM2G046532	266119_at	AT2G02100
GRMZM2G046558	245115_at	AT2G41530
GRMZM2G046574	248492_at	AT5G51040
GRMZM2G046576	252295_at	AT3G49100
GRMZM2G046590	248355_at	AT5G52340
GRMZM2G046615	264430_at	AT1G61680
GRMZM2G046618	245052_at	AT2G26440
GRMZM2G046658	267114_at	AT2G14835
GRMZM2G046676	249060_at	AT5G44560
GRMZM2G046681	255691_at	AT4G00370
GRMZM2G046782	246034_at	AT5G08350
GRMZM2G046824	261720_at	AT1G08460
GRMZM2G046846	262565_at	AT1G34320
GRMZM2G046849	261295_at	AT1G48450
GRMZM2G046885	264054_at	AT2G22540
GRMZM2G046900	254158_at	AT4G24380
GRMZM2G046909	252134_at	AT3G50910
GRMZM2G046911	249024_at	AT5G44860
GRMZM2G046932	246845_at	AT5G26710
GRMZM2G046961	262574_at	AT1G15230
[truncated: 6,906 more rows]
